# Supplementary material for: Rrp1b, a New Candidate Susceptibility Gene for Breast Cancer Progression and Metastasis
Source: PubMed Central journal article supplement (PMC2098807; doi:10.1371/journal.pgen.0030214), 2007-11-30

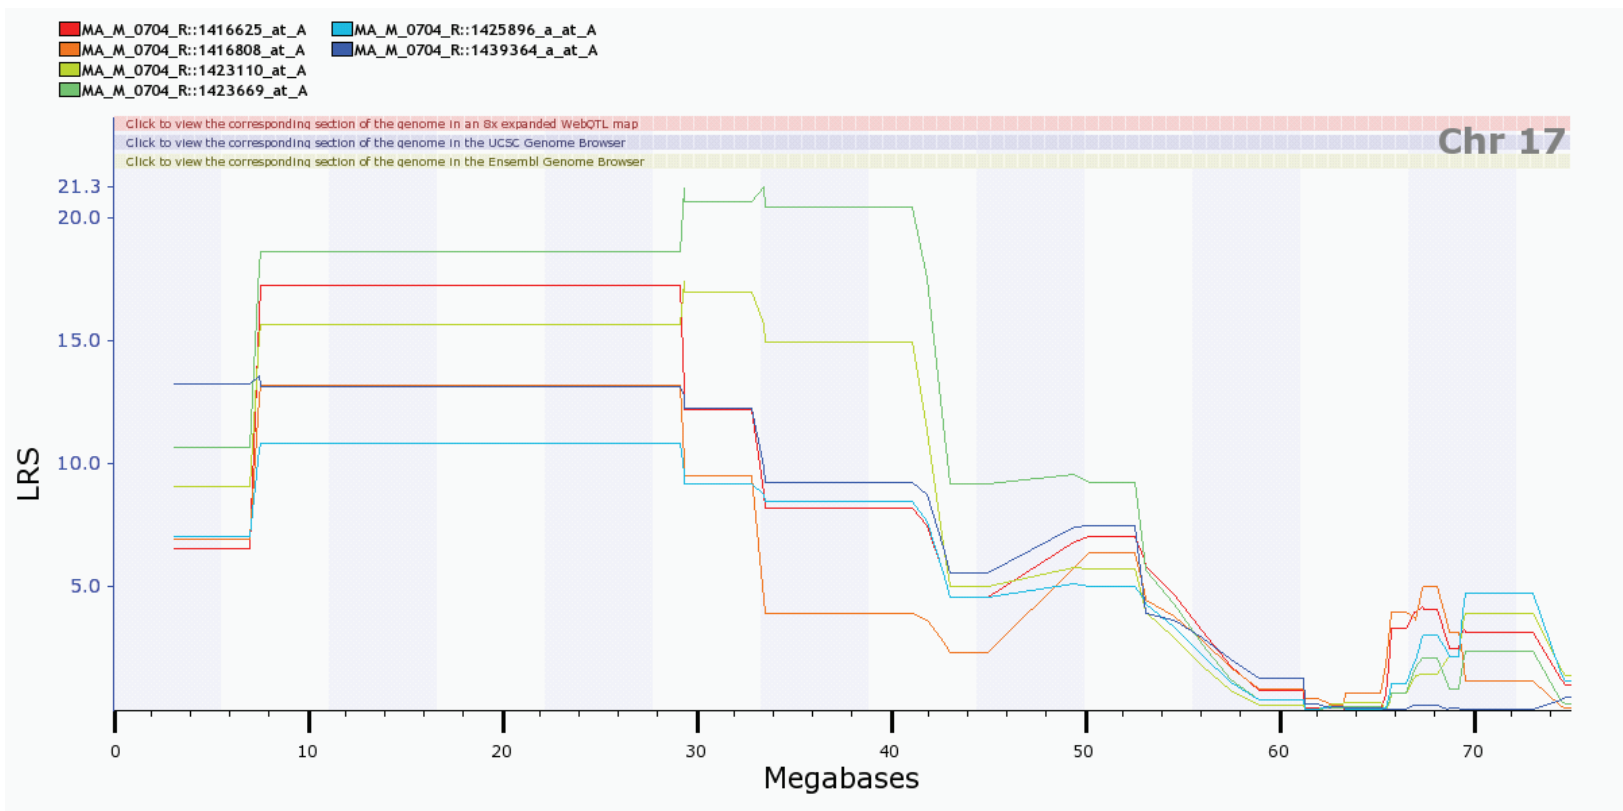

Supplement: pgen.0030214.sg001.pdf [file pgen.0030214.sg001.pdf]
