# Supplementary material for: Rrp1b, a New Candidate Susceptibility Gene for Breast Cancer Progression and Metastasis
Source: PLoS Genet. 2007 Nov 30;3(11):e214. doi: 10.1371/journal.pgen.0030214 (PMC2098807; doi:10.1371/journal.pgen.0030214)
Supplement: Table S7 — (142 KB XLS) [file pgen.0030214.st007.xls]

## Sheet: Sheet1
Table S7. Genes Up-Regulated by Ectopic Expression of Rrp1b in Mvt-1 Cells
	Fold difference of geom means (control/transfected cell lines)	Probe set	Gene symbol	Description
1	59.88	1453275_at	2310002L13Rik	RIKEN cDNA 2310002L13 gene
2	45.37	1422011_s_at	Xlr /// 3830403N18Rik	X-linked lymphocyte-regulated complex /// RIKEN cDNA 3830403N18 gene
3	35.231	1440557_at	Ipw	imprinted gene in the Prader-Willi syndrome region
4	32.555	1426181_a_at	Il24	interleukin 24
5	18.132	1426615_s_at	Ndrg4	N-myc downstream regulated gene 4
6	16.046	1436188_a_at	Ndrg4	N-myc downstream regulated gene 4
7	14.663	1456326_at	Gm784	gene model 784, (NCBI)
8	13.938	1450871_a_at	Bcat1	branched chain aminotransferase 1, cytosolic
9	12.981	1419082_at	Serpinb2	serine (or cysteine) proteinase inhibitor, clade B, member 2
10	12.742	1451791_at	Tfpi	tissue factor pathway inhibitor
11	12.488	1426851_a_at	Nov	nephroblastoma overexpressed gene
12	12.135	1420310_at
13	11.476	1426852_x_at	Nov	nephroblastoma overexpressed gene
14	11.333	1452367_at	Coro2a	coronin, actin binding protein 2A
15	11.26	1421979_at	Phex	phosphate regulating gene with homologies to endopeptidases on the X chromosome (hypophosphatemia, vitamin D resistant rickets)
16	10.722	1416295_a_at	Il2rg	interleukin 2 receptor, gamma chain
17	10.426	1443653_at	D930038M13Rik	RIKEN cDNA D930038M13 gene
18	10.065	1424339_at	Oasl1	2'-5' oligoadenylate synthetase-like 1
19	9.711	1451790_a_at	Tfpi	tissue factor pathway inhibitor
20	9.565	1452679_at	2410129E14Rik	RIKEN cDNA 2410129E14 gene
21	9.376	1417267_s_at	Fkbp11	FK506 binding protein 11
22	9.339	1421134_at	Areg	amphiregulin
23	9.03	1416368_at	Gsta4	glutathione S-transferase, alpha 4
24	9.021	1426074_at	LOC434536	LOC434536
25	8.211	1416203_at	Aqp1	aquaporin 1
26	7.553	1436199_at	Trim14	Tripartite motif-containing 14
27	7.126	1425113_x_at		PREDICTED: Mus musculus LOC433960 (LOC433960), mRNA
28	7.122	1416296_at	Il2rg	interleukin 2 receptor, gamma chain
29	7	1449500_at	Serpinb7	serine (or cysteine) proteinase inhibitor, clade B, member 7
30	6.94	1418930_at	Cxcl10	chemokine (C-X-C motif) ligand 10
31	6.91	1460600_at	LOC245350	hypothetical LOC245350
32	6.843	1452432_at	Tfpi	tissue factor pathway inhibitor
33	6.766	1424131_at	Col6a3	procollagen, type VI, alpha 3
34	6.705	1426061_x_at	Cul4a	Cullin 4A
35	6.5	1456319_at	X83313	EST X83313
36	6.167	1449005_at	Slc16a3	solute carrier family 16 (monocarboxylic acid transporters), member 3
37	6.085	1423702_at	H1f0	H1 histone family, member 0
38	6.061	1428984_a_at	1700012B09Rik	RIKEN cDNA 1700012B09 gene
39	5.991	1458382_a_at
40	5.797	1437867_at		PREDICTED: Mus musculus similar to protease (LOC434722), mRNA
41	5.747	1419703_at	Col5a3	procollagen, type V, alpha 3
42	5.601	1442947_x_at		13 days embryo heart cDNA, RIKEN full-length enriched library, clone:D330042P15 product:unclassifiable, full insert sequence
43	5.477	1426060_at	Cul4a	Cullin 4A
44	5.312	1430261_at	1700024J04Rik	RIKEN cDNA 1700024J04 gene
45	5.067	1450522_a_at	H1f0	H1 histone family, member 0
46	5.057	1420804_s_at	Clec4d	C-type lectin domain family 4, member d
47	4.995	1415806_at	Plat	plasminogen activator, tissue
48	4.865	1449133_at	Sprr1a	small proline-rich protein 1A
49	4.84	1438530_at	Tfpi	tissue factor pathway inhibitor
50	4.783	1455795_at	Sart2	squamous cell carcinoma antigen recognized by T cells 2
51	4.721	1449682_s_at	2410129E14Rik	RIKEN cDNA 2410129E14 gene
52	4.717	1424890_at	Bnc1	basonuclin 1
53	4.498	1435410_at	Tcam1	testicular cell adhesion molecule 1
54	4.449	1447886_at	0610040B09Rik	RIKEN cDNA 0610040B09 gene
55	4.432	1437648_at	Pcyt1b	phosphate cytidylyltransferase 1, choline, beta isoform
56	4.306	1456144_at	Nav3	neuron navigator 3
57	4.268	1438577_at		Transcribed locus
58	4.118	1427341_at	E130103I17Rik	RIKEN cDNA E130103I17 gene
59	3.996	1449378_at	Krt1-c29	keratin complex-1, acidic, gene C29
60	3.844	1424608_a_at	Multiple Gene Symbols	similar to novel protein /// similar to hypothetical protein MGC37588 /// similar to novel protein /// similar to novel protein /// similar to novel protein /// similar to novel protein /// similar to novel protein /// similar to hypothetical protein MGC37588 /// similar to novel protein /// similar to hypothetical protein /// similar to novel protein /// similar to novel protein /// similar to n…
61	3.821	1453345_at	3830408G10Rik	RIKEN cDNA 3830408G10 gene
62	3.756	1420550_at	1110055J05Rik	RIKEN cDNA 1110055J05 gene
63	3.726	1418126_at	Ccl5	chemokine (C-C motif) ligand 5
64	3.66	1435998_at		Gene model 288, (NCBI)
65	3.633	1418879_at	9030611O19Rik	RIKEN cDNA 9030611O19 gene
66	3.619	1449424_at	Plek2	pleckstrin 2
67	3.594	1455970_at		Transcribed locus
68	3.59	1450791_at	Nppb	natriuretic peptide precursor type B
69	3.517	1434083_a_at	4831417L10	Hypothetical protein 4831417L10
70	3.382	1449740_s_at	Dsg2	desmoglein 2
71	3.359	1430111_a_at	Bcat1	branched chain aminotransferase 1, cytosolic
72	3.295	1441275_at	MGI:2661430	T-cell activation kelch repeat protein
73	3.289	1428799_at	4930431B11Rik	RIKEN cDNA 4930431B11 gene
74	3.288	1449088_at	Fbp2	fructose bisphosphatase 2
75	3.27	1424470_a_at	Rapgef3	Rap guanine nucleotide exchange factor (GEF) 3
76	3.246	1421679_a_at	Cdkn1a	cyclin-dependent kinase inhibitor 1A (P21)
77	3.192	1433536_at	Lrp11	low density lipoprotein receptor-related protein 11
78	3.187	1437270_a_at	Bsf3	Cardiotrophin-like cytokine factor 1
79	3.158	1455843_at	Fut4	fucosyltransferase 4
80	3.147	1435669_at	Zfp532	zinc finger protein 532
81	3.139	1431176_at	2310010I16Rik	RIKEN cDNA 2310010I16 gene
82	3.118	1460550_at	Mtmr11	myotubularin related protein 11
83	3.031	1435342_at	Kcnk6	potassium inwardly-rectifying channel, subfamily K, member 6
84	3.031	1425619_s_at	Dsg2	desmoglein 2
85	3.027	1451483_s_at	1700054N08Rik	RIKEN cDNA 1700054N08 gene
86	3.016	1454136_a_at	4921524J17Rik	RIKEN cDNA 4921524J17 gene
87	3.011	1430999_a_at	Scoc	short coiled-coil protein
88	2.994	1452858_at	Elavl1	ELAV (embryonic lethal, abnormal vision, Drosophila)-like 1 (Hu antigen R)
89	2.983	1457823_at	Cyr61	cysteine rich protein 61
90	2.983	1442340_x_at	Cyr61	cysteine rich protein 61
91	2.976	1457145_at	Plekhg4	pleckstrin homology domain containing, family G (with RhoGef domain) member 4
92	2.946	1431182_at	Hspa8 /// LOC432432 /// LOC432883 /// LOC434047	heat shock protein 8 /// similar to heat shock protein 8 /// similar to heat shock protein 8 /// similar to Heat shock cognate 71 kDa protein
93	2.944	1434261_at	Sipa1l2	signal-induced proliferation-associated 1 like 2
94	2.916	1421540_at	Tcam1	testicular cell adhesion molecule 1
95	2.9	1420008_s_at	BC037006	cDNA sequence BC037006
96	2.89	1424796_at	1700054N08Rik	RIKEN cDNA 1700054N08 gene
97	2.885	1439758_at	Als2cr12	amyotrophic lateral sclerosis 2 (juvenile) chromosome region, candidate 12 (human)
98	2.877	1434279_at
99	2.861	1427518_at	D10627	cDNA sequence D10627
100	2.847	1422140_at	Sp100-rs	similar to component of Sp100-rs
101	2.839	1426153_a_at	Dsg2	desmoglein 2
102	2.835	1435379_at
103	2.83	1449252_at	9030611O19Rik	RIKEN cDNA 9030611O19 gene
104	2.811	1433902_at	MGI:2661430	T-cell activation kelch repeat protein
105	2.797	1424291_at	Nup93	nucleoporin 93
106	2.786	1438307_at
107	2.782	1420437_at	Indo	indoleamine-pyrrole 2,3 dioxygenase
108	2.764	1437671_x_at	Prss23	protease, serine, 23
109	2.756	1420741_x_at	2310069N01Rik	RIKEN cDNA 2310069N01 gene
110	2.753	1422550_a_at	Mtap6	microtubule-associated protein 6
111	2.749	1439476_at	Dsg2	desmoglein 2
112	2.717	1448942_at	Gng11	guanine nucleotide binding protein (G protein), gamma 11
113	2.701	1422273_at	Mmp1b	matrix metalloproteinase 1b (interstitial collagenase)
114	2.696	1439840_at	A430088C08Rik	RIKEN cDNA A430088C08 gene
115	2.687	1457774_at	2310079N02Rik	RIKEN cDNA 2310079N02 gene
116	2.685	1422804_at	Serpinb6b	serine (or cysteine) proteinase inhibitor, clade B, member 6b
117	2.677	1455262_at	0610010D24Rik	RIKEN cDNA 0610010D24 gene
118	2.673	1422967_a_at	Tfrc	transferrin receptor
119	2.664	1433730_at	Elmod2	ELMO domain containing 2
120	2.657	1455435_s_at
121	2.638	AFFX-TransRecMur/X57349_5_at	Tfrc	transferrin receptor
122	2.637	1418415_at	Hoxb5	homeo box B5
123	2.621	1425118_at	Spire2	spire homolog 2 (Drosophila)
124	2.619	1441891_x_at	Elovl7	ELOVL family member 7, elongation of long chain fatty acids (yeast)
125	2.604	1417178_at	Gipc2	GIPC PDZ domain containing family, member 2
126	2.581	1434280_at
127	2.576	1434003_a_at	Dhps	deoxyhypusine synthase
128	2.572	1422168_a_at	Bdnf	brain derived neurotrophic factor
129	2.572	1455249_at		Hypothetical gene supported by AK029001
130	2.555	1429161_at	Arv1	ARV1 homolog (yeast)
131	2.555	1437108_at	Lsm6	LSM6 homolog, U6 small nuclear RNA associated (S. cerevisiae)
132	2.55	1460053_at	Smyd4	SET and MYND domain containing 4
133	2.516	1416014_at	Abce1	ATP-binding cassette, sub-family E (OABP), member 1
134	2.511	1432431_s_at	1110033L15Rik	RIKEN cDNA 1110033L15 gene
135	2.498	1437250_at	MGI:2151839	whn-dependent transcript 2
136	2.473	1427483_at	Slc25a24	solute carrier family 25 (mitochondrial carrier, phosphate carrier), member 24
137	2.473	1454904_at	Mtm1	X-linked myotubular myopathy gene 1
138	2.469	1426436_at	8430420C20Rik	RIKEN cDNA 8430420C20 gene
139	2.468	1416267_at	Scoc	short coiled-coil protein
140	2.468	1429310_at	Flrt3	fibronectin leucine rich transmembrane protein 3
141	2.459	1434278_at	Mtm1	X-linked myotubular myopathy gene 1
142	2.445	1434097_at	D10627	CDNA sequence D10627
143	2.44	1435315_s_at	2900034E22Rik	RIKEN cDNA 2900034E22 gene
144	2.435	1416041_at	Sgk	serum/glucocorticoid regulated kinase
145	2.42	1422618_x_at
146	2.408	1448947_at	0610039J04Rik	RIKEN cDNA 0610039J04 gene
147	2.386	1436816_at	Nup133	Nucleoporin 133
148	2.386	1455796_x_at	Olfm1	olfactomedin 1
149	2.382	1422169_a_at	Bdnf	brain derived neurotrophic factor
150	2.381	1423586_at	Axl	AXL receptor tyrosine kinase
151	2.373	1455197_at	Rnd1	Rho family GTPase 1
152	2.362	1436281_at
153	2.359	1434296_at	LOC234413	similar to hypothetical protein FLJ38281
154	2.353	1424097_at	Elovl7	ELOVL family member 7, elongation of long chain fatty acids (yeast)
155	2.352	1425733_a_at	Eps8	epidermal growth factor receptor pathway substrate 8
156	2.349	1424537_at	1700017G21Rik /// LOC434724 /// LOC434725 /// LOC546185 /// LOC546187 /// LOC546199 /// LOC546203 /// LOC546204 /// LOC546259	RIKEN cDNA 1700017G21 gene /// similar to RIKEN cDNA 1700017G21 /// similar to Type 3 /// similar to mgclh /// similar to Type 3 /// similar to Type 3 /// similar to Type 3 /// similar to mgclh /// similar to Type 3
157	2.346	1418349_at	Hbegf	heparin-binding EGF-like growth factor
158	2.344	1453252_at	Dus4l	dihydrouridine synthase 4-like (S. cerevisiae)
159	2.324	1424638_at	Cdkn1a	cyclin-dependent kinase inhibitor 1A (P21)
160	2.323	1444584_at	LOC238535 /// 4921509E05Rik	piggyBac transposable element derived 1 (Pgbd1) pseudogene /// RIKEN cDNA 4921509E05 gene
161	2.319	1454090_at	Tprt	trans-prenyltransferase
162	2.317	1460397_at	Armc6	armadillo repeat containing 6
163	2.306	1437079_at	Slc18a2	solute carrier family 18 (vesicular monoamine), member 2
164	2.298	1416015_s_at	Abce1	ATP-binding cassette, sub-family E (OABP), member 1
165	2.297	1433789_at	Rnu17d	RNA, U17d small nucleolar
166	2.296	1434004_at	Dhps	deoxyhypusine synthase
167	2.286	1452656_at	Zdhhc2	zinc finger, DHHC domain containing 2
168	2.286	AFFX-TransRecMur/X57349_3_at	Tfrc	transferrin receptor
169	2.284	1423081_a_at	Tomm20 /// LOC546321	translocase of outer mitochondrial membrane 20 homolog (yeast) /// similar to translocase of outer mitochondrial membrane 20 homolog
170	2.284	AFFX-TransRecMur/X57349_M_at	Tfrc	transferrin receptor
171	2.281	1436595_at	Rbm34	RNA binding motif protein 34
172	2.271	1448844_at	1810044O22Rik	RIKEN cDNA 1810044O22 gene
173	2.27	1416067_at	Ifrd1	interferon-related developmental regulator 1
174	2.269	1456037_x_at	Preb	prolactin regulatory element binding
175	2.268	1424590_at	Ddx19b	DEAD (Asp-Glu-Ala-Asp) box polypeptide 19b
176	2.263	1436585_at	BB182297	expressed sequence BB182297
177	2.259	1422824_s_at	Eps8	epidermal growth factor receptor pathway substrate 8
178	2.255	1421495_a_at	1700052N19Rik	RIKEN cDNA 1700052N19 gene
179	2.252	1438076_at	Rpl30	ribosomal protein L30
180	2.25	1423787_at	Nup133	nucleoporin 133
181	2.244	1434958_at	Sacs	sacsin
182	2.241	1449557_at	1600012F09Rik	RIKEN cDNA 1600012F09 gene
183	2.239	1451254_at	Ikbkap	inhibitor of kappa light polypeptide enhancer in B-cells, kinase complex-associated protein
184	2.239	1436808_x_at	Mcm5	minichromosome maintenance deficient 5, cell division cycle 46 (S. cerevisiae)
185	2.239	1449048_s_at	Rab4a	RAB4A, member RAS oncogene family
186	2.235	1420774_a_at	4930583H14Rik	RIKEN cDNA 4930583H14 gene
187	2.233	1430030_at	5330426P16Rik	RIKEN cDNA 5330426P16 gene
188	2.229	1422526_at	Acsl1	acyl-CoA synthetase long-chain family member 1
189	2.222	1459888_at	LOC545261	hypothetical protein LOC545261
190	2.221	1429848_at	Pvr	poliovirus receptor
191	2.219	1423421_at	MGI:1930842	globin inducing factor, fetal
192	2.216	1454684_at	Bbs7	Bardet-Biedl syndrome 7
193	2.215	1436765_at	Pard3	par-3 (partitioning defective 3) homolog (C. elegans)
194	2.215	1432249_a_at	Ercc8	excision repaiross-complementing rodent repair deficiency, complementation group 8
195	2.211	1423010_at	Sacs	sacsin
196	2.21	1452687_at	Dus2l	dihydrouridine synthase 2-like (SMM1, S. cerevisiae)
197	2.21	1451175_at	Spcs3	signal peptidase complex subunit 3 homolog (S. cerevisiae)
198	2.21	1436538_at	Lrp2bp	Lrp2 binding protein
199	2.204	1428797_at	0610039J04Rik	RIKEN cDNA 0610039J04 gene
200	2.201	1436348_at		Transcribed locus
201	2.19	1452654_at	Zdhhc2	zinc finger, DHHC domain containing 2
202	2.187	1460036_at	Ap1s2	adaptor-related protein complex 1, sigma 2 subunit
203	2.187	1460483_at	2610034E01Rik	RIKEN cDNA 2610034E01 gene
204	2.177	1423883_at	Acsl1	Acyl-CoA synthetase long-chain family member 1
205	2.174	1416403_at	Abcb10	ATP-binding cassette, sub-family B (MDR/TAP), member 10
206	2.172	1445521_at	Elavl1	ELAV (embryonic lethal, abnormal vision, Drosophila)-like 1 (Hu antigen R)
207	2.171	1460500_at	5033421C21Rik	RIKEN cDNA 5033421C21 gene
208	2.17	1427127_x_at	Hspa1b	heat shock protein 1B
209	2.161	1451532_s_at	Steap	six transmembrane epithelial antigen of the prostate
210	2.16	1426871_at	Fbxo33	F-box only protein 33
211	2.16	1423602_at	Traf1	Tnf receptor-associated factor 1
212	2.159	1451384_at	3110005O21Rik	RIKEN cDNA 3110005O21 gene
213	2.159	1428105_at	Tpx2	TPX2, microtubule-associated protein homolog (Xenopus laevis)
214	2.159	1421534_at
215	2.148	1434044_at	Repin1	replication initiator 1
216	2.148	1443869_at	E430028B21Rik	RIKEN cDNA E430028B21 gene
217	2.147	1429587_at	Rbm34	RNA binding motif protein 34
218	2.136	1435697_a_at	Pscdbp	pleckstrin homology, Sec7 and coiled-coil domains, binding protein
219	2.134	1439263_at	Fin15	fibroblast growth factor inducible 15
220	2.134	1440221_at	AA408650	expressed sequence AA408650
221	2.125	1448884_at	Gtf2e2	general transcription factor II E, polypeptide 2 (beta subunit)
222	2.123	1429216_at	Paqr3	progestin and adipoQ receptor family member III
223	2.123	1442753_at		Transcribed locus
224	2.119	1429149_at	2700085M18Rik	RIKEN cDNA 2700085M18 gene
225	2.119	1434229_a_at	Polb	polymerase (DNA directed), beta
226	2.119	1451343_at	2210415M20Rik	RIKEN cDNA 2210415M20 gene
227	2.115	1455118_at	D9Ertd402e	DNA segment, Chr 9, ERATO Doi 402, expressed
228	2.114	1425206_a_at	Tsc22d4	TSC22 domain family 4
229	2.112	1418227_at	Orc2l	origin recognition complex, subunit 2-like (S. cerevisiae)
230	2.107	1428903_at	3110037I16Rik	RIKEN cDNA 3110037I16 gene
231	2.107	1453050_at	2700085M18Rik	RIKEN cDNA 2700085M18 gene
232	2.104	1450076_at	4933411K20Rik	RIKEN cDNA 4933411K20 gene
233	2.102	1436706_at	Tmem32	transmembrane protein 32
234	2.095	1420991_at	Ankrd1	ankyrin repeat domain 1 (cardiac muscle)
235	2.095	1422966_a_at	Tfrc	transferrin receptor
236	2.093	1425581_s_at	Galnt7	UDP-N-acetyl-alpha-D-galactosamine: polypeptide N-acetylgalactosaminyltransferase 7
237	2.091	1438757_at	C130069I09Rik	RIKEN cDNA C130069I09 gene
238	2.09	1453836_a_at	Mgll	monoglyceride lipase
239	2.088	1426229_s_at	Kras	v-Ki-ras2 Kirsten rat sarcoma viral oncogene homolog
240	2.088	1419935_s_at	Csnk2a2	casein kinase II, alpha 2, polypeptide
241	2.086	1428760_at	Snapc3	small nuclear RNA activating complex, polypeptide 3
242	2.085	1439976_at	AI849156	expressed sequence AI849156
243	2.078	1430571_s_at	Armc6	armadillo repeat containing 6
244	2.075	1446417_at	Serpinb6a	Receptor (TNFRSF)-interacting serine-threonine kinase 1
245	2.071	1439920_at
246	2.069	1436976_a_at	9930028C20Rik	RIKEN cDNA 9930028C20 gene
247	2.066	1418226_at	Orc2l	origin recognition complex, subunit 2-like (S. cerevisiae)
248	2.066	1450295_s_at	Pvr	poliovirus receptor
249	2.063	1426785_s_at	Mgll	monoglyceride lipase
250	2.059	1415830_at	Orc5l	origin recognition complex, subunit 5-like (S. cerevisiae)
251	2.058	1428798_s_at	0610039J04Rik	RIKEN cDNA 0610039J04 gene
252	2.058	1452605_at	Thnsl1	threonine synthase-like 1 (bacterial)
253	2.053	1453025_at	1110033L15Rik	RIKEN cDNA 1110033L15 gene
254	2.052	1456590_x_at	Akr1b3 /// LOC432549	aldo-keto reductase family 1, member B3 (aldose reductase) /// similar to Aldo-keto reductase family 1, member B3 (aldose reductase)
255	2.049	1439516_at	2610201A13Rik	RIKEN cDNA 2610201A13 gene
256	2.046	1434355_at	Zfp617	Similar to hypothetical protein FLJ38281
257	2.044	1423643_at	Ddx39	DEAD (Asp-Glu-Ala-Asp) box polypeptide 39
258	2.043	1452744_at	2210016F16Rik	RIKEN cDNA 2210016F16 gene
259	2.041	1417767_at	1810044O22Rik	RIKEN cDNA 1810044O22 gene
260	2.041	1438631_x_at	Ttc13	tetratricopeptide repeat domain 13
261	2.039	1434350_at	Axud1	AXIN1 up-regulated 1
262	2.035	1433467_at	Slc7a6	solute carrier family 7 (cationic amino acid transporter, y+ system), member 6
263	2.034	1417456_at	Gnpat	glyceronephosphate O-acyltransferase
264	2.033	1451351_at	Ttc13	tetratricopeptide repeat domain 13
265	2.033	1460380_at	Dsg2	desmoglein 2
266	2.032	1423685_at	Aars	alanyl-tRNA synthetase
267	2.032	1423848_at	Mphosph6	M phase phosphoprotein 6
268	2.031	1448145_at	Wwp2	WW domain containing E3 ubiquitin protein ligase 2
269	2.031	1434140_at	Mcf2l	mcf.2 transforming sequence-like
270	2.031	1424697_at	Dtwd1	DTW domain containing 1
271	2.029	1450262_at	Clcf1	cardiotrophin-like cytokine factor 1
272	2.029	1451273_x_at	BC025546	cDNA sequence BC025546
273	2.028	1423044_at	Prosc	proline synthetase co-transcribed
274	2.028	1437709_x_at	Ttc13	tetratricopeptide repeat domain 13
275	2.027	1440995_at	6430531B16Rik	RIKEN cDNA 6430531B16 gene
276	2.023	1429061_at	1810063B05Rik	RIKEN cDNA 1810063B05 gene
277	2.023	1453100_at	Csnk2a2	casein kinase II, alpha 2, polypeptide
278	2.022	1433487_at	Clcn3	chloride channel 3
279	2.015	1450037_at	Usp9x	ubiquitin specific protease 9, X chromosome
280	2.011	1448944_at	Nrp1	neuropilin 1
281	2.011	1444052_at	Flt4	FMS-like tyrosine kinase 4
282	2.008	1426737_at
283	2.006	1447934_at	9630033F20Rik	RIKEN cDNA 9630033F20 gene
284	2.005	1453077_a_at	Snapc3	small nuclear RNA activating complex, polypeptide 3
285	2	1437012_x_at	Rapgef3	Rap guanine nucleotide exchange factor (GEF) 3
286	2	1458667_at	4930519N13Rik	RIKEN cDNA 4930519N13 gene
287	2	1447275_at	Gm1805	gene model 1805, (NCBI)
288	2	1456259_at
289	1.999	1434200_at	BC010981	cDNA sequence BC010981
290	1.996	1419470_at	Gnb4	guanine nucleotide binding protein, beta 4
291	1.995	1449546_a_at	Zfp617	zinc finger protein 617
292	1.995	1436071_at	Ankrd26	ankyrin repeat domain 26
293	1.99	1440421_at	2700085M18Rik	RIKEN cDNA 2700085M18 gene
294	1.987	1418225_at	Orc2l	origin recognition complex, subunit 2-like (S. cerevisiae)
295	1.987	1433640_at
296	1.985	1434230_at	Polb /// A430088C08Rik	polymerase (DNA directed), beta /// RIKEN cDNA A430088C08 gene
297	1.983	1424232_a_at	BC025546	cDNA sequence BC025546
298	1.983	1429363_at	D8Ertd531e	DNA segment, Chr 8, ERATO Doi 531, expressed
299	1.982	1441376_at	Gabarapl2	gamma-aminobutyric acid (GABA-A) receptor-associated protein-like 2
300	1.979	1420992_at	Ankrd1	ankyrin repeat domain 1 (cardiac muscle)
301	1.978	1455637_x_at
302	1.978	1451323_at	Zfp7	zinc finger protein 7
303	1.976	1450391_a_at	Mgll	monoglyceride lipase
304	1.974	1417511_at	Lyar	Ly1 antibody reactive clone
305	1.971	1417719_at	Sap30	sin3 associated polypeptide
306	1.971	1454018_at	Tlk2	tousled-like kinase 2 (Arabidopsis)
307	1.97	1451065_a_at	Ddx39	DEAD (Asp-Glu-Ala-Asp) box polypeptide 39
308	1.969	1431086_s_at	Pcmt1	Protein-L-isoaspartate (D-aspartate) O-methyltransferase 1
309	1.968	1451095_at	Asns	asparagine synthetase
310	1.967	1418820_s_at	Zcchc10	zinc finger, CCHC domain containing 10
311	1.966	1434369_a_at	Cryab	crystallin, alpha B
312	1.965	1452717_at	Slc25a24	solute carrier family 25 (mitochondrial carrier, phosphate carrier), member 24
313	1.965	1433383_at	1500002K03Rik	RIKEN cDNA 1500002K03 gene
314	1.963	1451216_at	Zfp330	zinc finger protein 330
315	1.963	1436434_at	9230110J10	hypothetical protein 9230110J10
316	1.963	1438490_at	Slc39a14	solute carrier family 39 (zinc transporter), member 14
317	1.96	1423395_at	Tsnax	translin-associated factor X
318	1.959	1439050_at	AI649393	expressed sequence AI649393
319	1.959	1460474_at	2610028L16Rik	RIKEN cDNA 2610028L16 gene
320	1.955	1416860_s_at	Ing1	inhibitor of growth family, member 1
321	1.949	1454947_a_at	BC002236	cDNA sequence BC002236
322	1.947	1420936_s_at	Cpsf2	cleavage and polyadenylation specific factor 2
323	1.945	1454659_at	Dctd	dCMP deaminase
324	1.945	1418350_at	Hbegf	heparin-binding EGF-like growth factor
325	1.942	1415788_at	BC002236	cDNA sequence BC002236
326	1.942	1440989_at
327	1.941	1418308_at	Hus1	Hus1 homolog (S. pombe)
328	1.939	1450980_at	Gtpbp3	GTP binding protein 3
329	1.936	1453577_at	2610018I03Rik	RIKEN cDNA 2610018I03 gene
330	1.935	1426426_at	Rbm13	RNA binding motif protein 13
331	1.932	1460447_at	3000003F02Rik	RIKEN cDNA 3000003F02 gene
332	1.932	1429596_at	2400002F02Rik	RIKEN cDNA 2400002F02 gene
333	1.931	1418553_at	Arhgef18	rho/rac guanine nucleotide exchange factor (GEF) 18
334	1.931	1415868_at	Cct4	chaperonin subunit 4 (delta)
335	1.93	1431893_a_at	Tprt	trans-prenyltransferase
336	1.925	1416755_at	Dnajb1	DnaJ (Hsp40) homolog, subfamily B, member 1
337	1.924	1455814_x_at	Ddx39	DEAD (Asp-Glu-Ala-Asp) box polypeptide 39
338	1.924	1438168_x_at	Ddx39	DEAD (Asp-Glu-Ala-Asp) box polypeptide 39
339	1.924	1439387_x_at	2310061F22Rik	RIKEN cDNA 2310061F22 gene
340	1.92	1450389_s_at	Pip5k1a	phosphatidylinositol-4-phosphate 5-kinase, type 1 alpha
341	1.916	1457316_at	Mtap6	microtubule-associated protein 6
342	1.915	1450909_at	Eif4e	eukaryotic translation initiation factor 4E
343	1.915	1426908_at	Galnt7	UDP-N-acetyl-alpha-D-galactosamine: polypeptide N-acetylgalactosaminyltransferase 7
344	1.914	1422767_at	Bysl	bystin-like
345	1.914	1417266_at	Ccl6	chemokine (C-C motif) ligand 6
346	1.912	1432103_a_at	Sh3gl3	SH3-domain GRB2-like 3
347	1.911	1424186_at	2610001E17Rik	RIKEN cDNA 2610001E17 gene
348	1.908	1428566_at	Hspbap1	Hspb associated protein 1
349	1.904	1420138_at	Slc19a1	solute carrier family 19 (sodium/hydrogen exchanger), member 1
350	1.904	1438527_at	Rpl3 /// LOC244512 /// LOC433745 /// LOC544982 /// LOC545543 /// LOC545545 /// LOC545864 /// LOC547402
351	1.903	1451206_s_at	Pscdbp	pleckstrin homology, Sec7 and coiled-coil domains, binding protein
352	1.9	1437271_at	Bsf3	Cardiotrophin-like cytokine factor 1
353	1.9	1460561_x_at	Sepw1	selenoprotein W, muscle 1
354	1.897	1436979_x_at	Rbm14	RNA binding motif protein 14
355	1.891	1419253_at	Mthfd2	methylenetetrahydrofolate dehydrogenase (NAD+ dependent), methenyltetrahydrofolate cyclohydrolase
356	1.888	1424142_at	Ikbkap	inhibitor of kappa light polypeptide enhancer in B-cells, kinase complex-associated protein
357	1.887	1437133_x_at	Akr1b3 /// LOC432549	aldo-keto reductase family 1, member B3 (aldose reductase) /// similar to Aldo-keto reductase family 1, member B3 (aldose reductase)
358	1.884	1451248_at	BC006705	cDNA sequence BC006705
359	1.883	1441788_s_at	BC068171	cDNA sequence BC068171
360	1.883	1420537_at	Kctd4	potassium channel tetramerisation domain containing 4
361	1.882	1422141_s_at	Csprs	component of Sp100-rs
362	1.877	1437067_at	Phtf2	putative homeodomain transcription factor 2
363	1.876	1424327_at	3200002M19Rik	RIKEN cDNA 3200002M19 gene
364	1.876	1453036_at	5430439M09Rik	RIKEN cDNA 5430439M09 gene
365	1.871	1432164_a_at	Gcsh	glycine cleavage system protein H (aminomethyl carrier)
366	1.871	1451166_a_at	1700023O11Rik	RIKEN cDNA 1700023O11 gene
367	1.871	1437077_at	AW495713	expressed sequence AW495713
368	1.865	1418884_x_at	Tuba1	tubulin, alpha 1
369	1.864	1438360_x_at	Slc25a5	solute carrier family 25 (mitochondrial carrier, adenine nucleotide translocator), member 5
370	1.862	1416455_a_at	Cryab	crystallin, alpha B
371	1.862	1437495_at	Mbtps2	membrane-bound transcription factor protease, site 2
372	1.855	1428711_at	Mon1b	MON1 homolog b (yeast)
373	1.855	1428592_s_at	Usp38	ubiquitin specific protease 38
374	1.854	1457034_at	D14Abb1e	DNA segment, Chr 14, Abbott 1 expressed
375	1.853	1429617_at	Cyld	cylindromatosis (turban tumor syndrome)
376	1.853	1423884_at	Tex292	testis expressed gene 292
377	1.852	1452655_at	Zdhhc2	zinc finger, DHHC domain containing 2
378	1.852	1424568_at	Tspan2	tetraspan 2
379	1.852	1448319_at	LOC432549	similar to Aldo-keto reductase family 1, member B3 (aldose reductase)
380	1.851	1455523_at	Cstf2	cleavage stimulation factor, 3' pre-RNA subunit 2
381	1.849	1416610_a_at	Clcn3	chloride channel 3
382	1.847	1453035_at	Lnp	limb and neural patterns
383	1.847	1456566_x_at	Rbm14	RNA binding motif protein 14
384	1.844	1438786_a_at	2610021A01Rik	RIKEN cDNA 2610021A01 gene
385	1.843	1421851_at	Ddx26	DEAD/H (Asp-Glu-Ala-Asp/His) box polypeptide 26
386	1.842	1424529_s_at	Cgref1	cell growth regulator with EF hand domain 1
387	1.84	1419058_at	Praf1	polymerase (RNA) I associated factor 1
388	1.838	1417766_at	1810044O22Rik	RIKEN cDNA 1810044O22 gene
389	1.837	1416499_a_at	Dctn6	dynactin 6
390	1.836	1451873_a_at	Smad5	MAD homolog 5 (Drosophila)
391	1.836	1452810_at	4921521J11Rik	RIKEN cDNA 4921521J11 gene
392	1.836	1452166_a_at	Krt1-10	keratin complex 1, acidic, gene 10
393	1.834	1416402_at	Abcb10	ATP-binding cassette, sub-family B (MDR/TAP), member 10
394	1.834	1455137_at	Rapgef5	Rap guanine nucleotide exchange factor (GEF) 5
395	1.834	1416442_at	Ier2	immediate early response 2
396	1.833	1416932_at	Cog2	component of oligomeric golgi complex 2
397	1.833	1455651_at	Terf2	telomeric repeat binding factor 2
398	1.833	1424513_at	Atp6v0a2	ATPase, H+ transporting, lysosomal V0 subunit a isoform 2
399	1.831	1433872_at	2410042D21Rik	RIKEN cDNA 2410042D21 gene
400	1.831	1429728_at	4930429M06Rik	RIKEN cDNA 4930429M06Rik
401	1.829	1439272_at	A830039H10Rik	RIKEN cDNA A830039H10 gene
402	1.826	1438761_a_at	Odc1 /// LOC545783 /// LOC546355	ornithine decarboxylase, structural 1 /// similar to Ornithine decarboxylase (ODC) /// similar to Ornithine decarboxylase (ODC)
403	1.824	1424328_s_at	3200002M19Rik	RIKEN cDNA 3200002M19 gene
404	1.822	1423873_at	Lsm1	LSM1 homolog, U6 small nuclear RNA associated (S. cerevisiae)
405	1.82	1435057_x_at	Praf1	polymerase (RNA) I associated factor 1
406	1.819	1448480_at	1110017C15Rik	RIKEN cDNA 1110017C15 gene
407	1.819	1458739_at	Ltbp1	Latent transforming growth factor beta binding protein 1
408	1.818	1449186_at	Bag4	BCL2-associated athanogene 4
409	1.818	1423039_a_at	Bzw1	basic leucine zipper and W2 domains 1
410	1.817	1460665_a_at	Cnot7	CCR4-NOT transcription complex, subunit 7
411	1.814	1448622_at	Lsm4	LSM4 homolog, U6 small nuclear RNA associated (S. cerevisiae)
412	1.813	1426784_at	Trim47	tripartite motif protein 47
413	1.813	1435797_at
414	1.811	1416552_at	Dppa5	developmental pluripotency associated 5
415	1.811	1453034_at	Zfp251	zinc finger protein 251
416	1.811	1454863_at	Ankrd11	ankyrin repeat domain 11
417	1.808	1456730_x_at	Actl6a	actin-like 6A
418	1.807	1454102_at	5031425E22Rik	RIKEN cDNA 5031425E22 gene
419	1.805	1429041_at	LOC436177	similar to Cadherin-11 precursor (Osteoblast-cadherin) (OB-cadherin) (OSF-4)
420	1.801	1424992_at	1810034M08Rik	RIKEN cDNA 1810034M08 gene
421	1.8	1442764_at	Suv420h1	suppressor of variegation 4-20 homolog 1 (Drosophila)
422	1.798	1455173_at	Gspt1	G1 to S phase transition 1
423	1.797	1451083_s_at	Aars	alanyl-tRNA synthetase
424	1.797	1458351_s_at	Klhl2	kelch-like 2, Mayven (Drosophila)
425	1.795	1415789_a_at	BC002236	cDNA sequence BC002236
426	1.793	1455029_at	Kif21a	kinesin family member 21A
427	1.792	1435534_a_at	Tomm20	translocase of outer mitochondrial membrane 20 homolog (yeast)
428	1.792	1453202_at	E330016A19Rik	RIKEN cDNA E330016A19 gene
429	1.79	1452232_at	Galnt7	UDP-N-acetyl-alpha-D-galactosamine: polypeptide N-acetylgalactosaminyltransferase 7
430	1.788	1436247_at	4632419I22Rik	RIKEN cDNA 4632419I22 gene
431	1.784	1420889_at	Hccs	holocytochrome c synthetase
432	1.784	1433670_at	Emp2	epithelial membrane protein 2
433	1.783	1417434_at	Gpd2	glycerol phosphate dehydrogenase 2, mitochondrial
434	1.782	1448106_at	1200016B17Rik	RIKEN cDNA 1200016B17 gene
435	1.781	1451566_at	BC005471	cDNA sequence BC005471
436	1.781	1419754_at	Myo5a	myosin Va
437	1.78	1417581_at	Dhodh	dihydroorotate dehydrogenase
438	1.78	1450643_s_at	Acsl1	acyl-CoA synthetase long-chain family member 1
439	1.78	1426870_at	Fbxo33	F-box only protein 33
440	1.778	1428702_at	Ddx28	DEAD (Asp-Glu-Ala-Asp) box polypeptide 28
441	1.778	1428800_a_at	3000003F02Rik	RIKEN cDNA 3000003F02 gene
442	1.777	1431349_at	Hnrpab	heterogeneous nuclear ribonucleoprotein A/B
443	1.776	1425594_at	Lamc3	laminin gamma 3
444	1.776	1456597_at	C030036P15Rik	RIKEN cDNA C030036P15 gene
445	1.774	1452816_at	Mlf1ip	myeloid leukemia factor 1 interacting protein
446	1.774	1419024_at	Ptp4a1	protein tyrosine phosphatase 4a1
447	1.773	1437254_at	6230425F05Rik	RIKEN cDNA 6230425F05 gene
448	1.769	1434961_at	Asb1	ankyrin repeat and SOCS box-containing protein 1
449	1.769	1436942_at	A930035D04Rik	RIKEN cDNA A930035D04 gene
450	1.769	1431065_at	Eaf1	ELL associated factor 1
451	1.764	1435099_at	Utp14a	UTP14, U3 small nucleolar ribonucleoprotein, homolog A (yeast)
452	1.764	1437069_at	Osbpl8	oxysterol binding protein-like 8
453	1.759	1417510_at	Vps4a	vacuolar protein sorting 4a (yeast)
454	1.753	1415784_at	Vps35	vacuolar protein sorting 35
455	1.751	1435891_x_at	2610021A01Rik	RIKEN cDNA 2610021A01 gene
456	1.749	1449972_s_at	Zfp97 /// BC018101	zinc finger protein 97 /// cDNA sequence BC018101
457	1.747	1433839_at	AI875199	expressed sequence AI875199
458	1.746	1448132_at	Slc19a1	solute carrier family 19 (sodium/hydrogen exchanger), member 1
459	1.746	1448473_at	Bub3	budding uninhibited by benzimidazoles 3 homolog (S. cerevisiae)
460	1.74	1424436_at	Gart	phosphoribosylglycinamide formyltransferase
461	1.739	1424205_at	Smarca5	SWI/SNF related, matrix associated, actin dependent regulator of chromatin, subfamily a, member 5
462	1.738	1452545_a_at	Itgb1	integrin beta 1 (fibronectin receptor beta)
463	1.738	1448368_at	Dctn6	dynactin 6
464	1.738	1424872_at	2310001H12Rik	RIKEN cDNA 2310001H12 gene
465	1.738	1434232_a_at
466	1.737	1424591_at	5830433M19Rik	RIKEN cDNA 5830433M19 gene
467	1.736	1424057_at	Gdap2	ganglioside-induced differentiation-associated-protein 2
468	1.736	1453745_at	2700038G22Rik	RIKEN cDNA 2700038G22 gene
469	1.735	1437983_at
470	1.733	1443165_at	Mrps31	mitochondrial ribosomal protein S31
471	1.732	1459842_x_at	Nubp2	nucleotide binding protein 2
472	1.731	1426918_at	Itgb1	integrin beta 1 (fibronectin receptor beta)
473	1.731	1442793_s_at	Tbrg4	transforming growth factor beta regulated gene 4
474	1.731	1460671_at	Gpx1	glutathione peroxidase 1
475	1.731	1435883_at	AW413431	expressed sequence AW413431
476	1.727	1436820_at	Kctd11	potassium channel tetramerisation domain containing 11
477	1.726	1428278_at	Zdhhc24	zinc finger, DHHC domain containing 24
478	1.726	1429375_at	Anapc10	anaphase promoting complex subunit 10
479	1.724	1433858_at	Lrrc28	leucine rich repeat containing 28
480	1.724	1436737_a_at	Sorbs1	sorbin and SH3 domain containing 1
481	1.723	1421834_at	Pip5k1a	phosphatidylinositol-4-phosphate 5-kinase, type 1 alpha
482	1.722	1415864_at	Bpgm	2,3-bisphosphoglycerate mutase
483	1.721	1432374_a_at	D5Wsu178e	DNA segment, Chr 5, Wayne State University 178, expressed
484	1.72	1429376_s_at	Anapc10	anaphase promoting complex subunit 10
485	1.719	1448069_at	Tm4sf1	transmembrane 4 superfamily member 1
486	1.719	1454750_a_at	BC057552	cDNA sequence BC057552
487	1.717	1433486_at	Clcn3	chloride channel 3
488	1.716	1415865_s_at	Bpgm	2,3-bisphosphoglycerate mutase
489	1.715	1425517_s_at	Ogt	O-linked N-acetylglucosamine (GlcNAc) transferase (UDP-N-acetylglucosamine:polypeptide-N-acetylglucosaminyl transferase)
490	1.715	1439912_at	9430098F02Rik	RIKEN cDNA 9430098F02 gene
491	1.713	1435303_at	Taf4b	TAF4B RNA polymerase II, TATA box binding protein (TBP)-associated factor
492	1.71	1450380_at	Epdr2	ependymin related protein 2 (zebrafish)
493	1.706	1427003_at	Ppp2r5c	protein phosphatase 2, regulatory subunit B (B56), gamma isoform
494	1.704	1429618_at	Cyld	cylindromatosis (turban tumor syndrome)
495	1.702	1448521_at	Brd7	bromodomain containing 7
496	1.7	1418336_at	Afg3l1	AFG3(ATPase family gene 3)-like 1 (yeast)
497	1.7	1421815_at	Epdr2	ependymin related protein 2 (zebrafish)
498	1.698	1454663_at	Eif5	eukaryotic translation initiation factor 5
499	1.698	1431686_a_at	Gmfb	glia maturation factor, beta
500	1.698	1423337_at	Orc4l	origin recognition complex, subunit 4-like (S. cerevisiae)
501	1.697	1455599_at	AI850995	expressed sequence AI850995
502	1.696	1451652_a_at	5033428A16Rik	RIKEN cDNA 5033428A16 gene
503	1.695	1428471_at	Sorbs1	sorbin and SH3 domain containing 1
504	1.695	1426415_a_at	Trim25	tripartite motif protein 25
505	1.694	1419181_at	Zfp326	zinc finger protein 326
506	1.692	1429601_x_at	1110019K23Rik	RIKEN cDNA 1110019K23 gene
507	1.692	1438922_x_at	Slc25a5 /// LOC433326	solute carrier family 25 (mitochondrial carrier, adenine nucleotide translocator), member 5 /// similar to adenine nucleotide translocase
508	1.692	1430778_a_at	Nubp1	nucleotide binding protein 1
509	1.692	1421147_at	Terf2	telomeric repeat binding factor 2
510	1.691	1442289_at	4930553M18Rik	RIKEN cDNA 4930553M18 gene
511	1.69	1417566_at	Abhd5	abhydrolase domain containing 5
512	1.69	1429320_at	4921511I16Rik	RIKEN cDNA 4921511I16 gene
513	1.688	1452813_a_at	5033428A16Rik	RIKEN cDNA 5033428A16 gene
514	1.687	1416790_a_at	Tdg /// LOC434200 /// LOC545124	thymine DNA glycosylase /// similar to Thymine DNA glycosylase /// similar to Thymine DNA glycosylase
515	1.684	1423882_at	Rfwd3	ring finger and WD repeat domain 3
516	1.683	1439553_s_at	Nutf2	nuclear transport factor 2
517	1.683	1455978_a_at	Matn2	matrilin 2
518	1.68	1433555_at	Eaf1	ELL associated factor 1
519	1.68	1417060_at	Ppp1r11	protein phosphatase 1, regulatory (inhibitor) subunit 11
520	1.68	1454822_x_at	Apcdd1	adenomatosis polyposis coli down-regulated 1
521	1.679	1423080_at	Tomm20	translocase of outer mitochondrial membrane 20 homolog (yeast)
522	1.677	1423545_a_at	Zfp207	zinc finger protein 207
523	1.674	1450405_at	Mrpl19	mitochondrial ribosomal protein L19
524	1.674	1424244_at	BC016198	cDNA sequence BC016198
525	1.672	1447720_x_at	Prkaca	Protein kinase, cAMP dependent, catalytic, alpha
526	1.671	1423905_at	Pvr	poliovirus receptor
527	1.671	1432245_s_at	2210019E14Rik	RIKEN cDNA 2210019E14 gene
528	1.667	1421261_at	Lipg	lipase, endothelial
529	1.667	1434817_s_at	4930535B03Rik	RIKEN cDNA 4930535B03 gene
530	1.666	1436156_at	Ccar1	cell division cycle and apoptosis regulator 1
531	1.666	1428534_at	2310073E15Rik	RIKEN cDNA 2310073E15 gene
532	1.665	1426716_at	Tdrd7	tudor domain containing 7
533	1.664	1436558_at	4930553M18Rik	RIKEN cDNA 4930553M18 gene
534	1.664	1418731_at	Rnf12	ring finger protein 12
535	1.663	1453102_at	Flrt3	fibronectin leucine rich transmembrane protein 3
536	1.663	1429461_at	2810417D08Rik	RIKEN cDNA 2810417D08 gene
537	1.662	1428996_at	Gm1705	gene model 1705, (NCBI)
538	1.662	1418563_at	1200009K13Rik	RIKEN cDNA 1200009K13 gene
539	1.662	1455268_at	Zcsl2	zinc finger, CSL domain containing 2
540	1.66	1429484_at	1110002L01Rik	RIKEN cDNA 1110002L01 gene
541	1.659	1420380_at	Ccl2	chemokine (C-C motif) ligand 2
542	1.658	1444076_at	Zfp81	zinc finger protein 81
543	1.657	1451056_at	Psmd7	proteasome (prosome, macropain) 26S subunit, non-ATPase, 7
544	1.655	1438366_x_at	Clcn3	chloride channel 3
545	1.655	1415985_at	Sf3b3	splicing factor 3b, subunit 3
546	1.654	1457292_at	4930553M18Rik	RIKEN cDNA 4930553M18 gene
547	1.653	1454354_at	8030476L19Rik	RIKEN cDNA 8030476L19 gene
548	1.653	1422599_s_at	Zfp143	zinc finger protein 143
549	1.652	1418591_at	Dnaja4	DnaJ (Hsp40) homolog, subfamily A, member 4
550	1.647	1460624_at	6330564D18Rik	RIKEN cDNA 6330564D18 gene
551	1.646	1436426_at	5730509K17Rik	RIKEN cDNA 5730509K17 gene
552	1.646	1428874_at	1110019N10Rik	RIKEN cDNA 1110019N10 gene
553	1.644	1442989_at	AI875199	Expressed sequence AI875199
554	1.644	1454795_at	Cobll1	Cobl-like 1
555	1.643	1418963_at	2310047O13Rik	RIKEN cDNA 2310047O13 gene
556	1.641	1416241_at	Sec13l1	SEC13-like 1 (S. cerevisiae)
557	1.641	1425516_at	Ogt	O-linked N-acetylglucosamine (GlcNAc) transferase (UDP-N-acetylglucosamine:polypeptide-N-acetylglucosaminyl transferase)
558	1.64	1448943_at	Nrp1	neuropilin 1
559	1.639	1429561_at	Brf2	BRF2, subunit of RNA polymerase III transcription initiation factor, BRF1-like
560	1.639	1451018_at	Leprotl1	leptin receptor overlapping transcript-like 1
561	1.639	1429291_at	Psmd1	proteasome (prosome, macropain) 26S subunit, non-ATPase, 1
562	1.638	1423890_x_at	Atp1b1	ATPase, Na+/K+ transporting, beta 1 polypeptide
563	1.636	1451262_a_at	MGI:2385237	JTV1 gene
564	1.636	1427269_at	Sfrs11	splicing factor, arginine/serine-rich 11
565	1.634	1451805_at	Phip	pleckstrin homology domain interacting protein
566	1.632	1437711_x_at	Odc1 /// LOC545783 /// LOC546355	ornithine decarboxylase, structural 1 /// similar to Ornithine decarboxylase (ODC) /// similar to Ornithine decarboxylase (ODC)
567	1.631	1435637_at	D8Wsu49e	DNA segment, Chr 8, Wayne State University 49, expressed
568	1.631	1435715_x_at	Tdg /// LOC434200 /// LOC545124	thymine DNA glycosylase /// similar to Thymine DNA glycosylase /// similar to Thymine DNA glycosylase
569	1.631	1437460_x_at	Rin1	Ras and Rab interactor 1
570	1.629	1448244_at	Lypla1	lysophospholipase 1
571	1.629	1424810_at	4930485D02Rik	RIKEN cDNA 4930485D02 gene
572	1.629	1448999_at	Trappc5	trafficking protein particle complex 5
573	1.629	1416376_at	1810014L12Rik	RIKEN cDNA 1810014L12 gene
574	1.623	1437422_at	Sema5a	sema domain, seven thrombospondin repeats (type 1 and type 1-like), transmembrane domain (TM) and short cytoplasmic domain, (semaphorin) 5A
575	1.621	1418246_at	Rbm9	RNA binding motif protein 9
576	1.62	1417565_at	Abhd5	abhydrolase domain containing 5
577	1.619	1428930_at	6330540D07Rik	RIKEN cDNA 6330540D07 gene
578	1.618	1426609_at	2810028N01Rik	RIKEN cDNA 2810028N01 gene
579	1.618	1438015_at	BC068171	cDNA sequence BC068171
580	1.618	1420849_at	Crnkl1	Crn, crooked neck-like 1 (Drosophila)
581	1.618	1426874_at	BC022641	cDNA sequence BC022641
582	1.616	1416234_at	AA959742	expressed sequence AA959742
583	1.613	1416341_at	Polr2c	polymerase (RNA) II (DNA directed) polypeptide C
584	1.613	1425273_s_at	Emp2	epithelial membrane protein 2
585	1.612	1423552_at	Leprotl1	leptin receptor overlapping transcript-like 1
586	1.612	1454171_x_at	9530053H05Rik	RIKEN cDNA 9530053H05 gene
587	1.611	1420009_at	BC037006	cDNA sequence BC037006
588	1.61	1419205_x_at	Gpatc4	G patch domain containing 4
589	1.609	1419287_at	MGI:1913570	HSPC171 protein
590	1.607	1417024_at	Hars	histidyl-tRNA synthetase
591	1.607	1428154_s_at	Ppapdc1	phosphatidic acid phosphatase type 2 domain containing 1
592	1.606	1435025_at	4930415J21Rik	RIKEN cDNA 4930415J21 gene
593	1.606	1418274_at	Nutf2	nuclear transport factor 2
594	1.606	1427342_at	5330408N05Rik	RIKEN cDNA 5330408N05 gene
595	1.606	1433674_a_at	Rnu22	RNA, U22 small nucleolar
596	1.605	1426821_at	Cog8	component of oligomeric golgi complex 8
597	1.605	1460551_at	Ran	RAN, member RAS oncogene family
598	1.604	1419115_at	5430428G01Rik	RIKEN cDNA 5430428G01 gene
599	1.603	1433663_s_at	LOC433702	nuclear cap binding protein subunit 1, 80kDa
600	1.602	1431939_a_at	Mina	myc induced nuclear antigen
601	1.601	1434660_at	Alkbh	alkB, alkylation repair homolog (E. coli)
602	1.6	1455081_at	Txnl4b	thioredoxin-like 4B
603	1.599	1448836_s_at	AI838661	expressed sequence AI838661
604	1.596	1448462_at	Tdg	thymine DNA glycosylase
605	1.596	1429155_at	4933411K20Rik	RIKEN cDNA 4933411K20 gene
606	1.595	1424357_at	Tmem45b	transmembrane protein 45b
607	1.595	1420704_at	Csf2ra	colony stimulating factor 2 receptor, alpha, low-affinity (granulocyte-macrophage)
608	1.595	1420856_a_at	Lancl2	LanC (bacterial lantibiotic synthetase component C)-like 2
609	1.595	1421107_at	Stk4	serine/threonine kinase 4
610	1.593	1428339_at	Cpsf5	cleavage and polyadenylation specific factor 5
611	1.592	1455644_at	3100002B05Rik	RIKEN cDNA 3100002B05 gene
612	1.592	1417779_at	2310079N02Rik	RIKEN cDNA 2310079N02 gene
613	1.592	1452086_at	2610027O18Rik	RIKEN cDNA 2610027O18 gene
614	1.591	1452182_at	Galnt2	UDP-N-acetyl-alpha-D-galactosamine:polypeptide N-acetylgalactosaminyltransferase 2
615	1.591	1415913_at	Rps13	ribosomal protein S13
616	1.591	1433660_at	D2Ertd435e	DNA segment, Chr 2, ERATO Doi 435, expressed
617	1.589	1423138_at	Wdr4	WD repeat domain 4
618	1.589	1434011_a_at	1110055N21Rik	RIKEN cDNA 1110055N21 gene
619	1.589	1429508_at	2310057M21Rik	RIKEN cDNA 2310057M21 gene
620	1.588	1422803_at	Fstl3	follistatin-like 3
621	1.588	1452362_at	Trim16	tripartite motif protein 16
622	1.587	1417406_at	Sertad1	SERTA domain containing 1
623	1.587	1417069_a_at	Gmfb	glia maturation factor, beta
624	1.586	1420857_at	Lancl2	LanC (bacterial lantibiotic synthetase component C)-like 2
625	1.585	1455259_a_at	D530033C11Rik	RIKEN cDNA D530033C11 gene
626	1.585	1460702_at	1810015M01Rik	RIKEN cDNA 1810015M01 gene
627	1.584	1416177_at	Rbmxrt	RNA binding motif protein, X chromosome retrogene
628	1.582	1433631_at	Eif5	eukaryotic translation initiation factor 5
629	1.582	1436208_at	Asb1	ankyrin repeat and SOCS box-containing protein 1
630	1.581	1452252_at	3830408P06Rik	RIKEN cDNA 3830408P06 gene
631	1.58	1451164_a_at	Mrps18b	mitochondrial ribosomal protein S18B
632	1.579	1433752_s_at	D030016E14Rik	RIKEN cDNA D030016E14 gene
633	1.579	1434845_at		Transcribed locus
634	1.578	1427771_x_at	Itgb1	integrin beta 1 (fibronectin receptor beta)
635	1.575	1421914_s_at	Mrpl19	mitochondrial ribosomal protein L19
636	1.575	1454957_at	1700021I09Rik	RIKEN cDNA 1700021I09 gene
637	1.574	1448580_at	Glg1	golgi apparatus protein 1
638	1.574	1459716_at	AI835735	expressed sequence AI835735
639	1.572	1423904_a_at	Pvr	poliovirus receptor
640	1.57	1456948_at	Ap4e1	adaptor-related protein complex AP-4, epsilon 1
641	1.569	1456844_at	Camk2d	calcium/calmodulin-dependent protein kinase II, delta
642	1.568	1460615_at	Nt5c2l1	5'-nucleotidase, cytosolic II-like 1
643	1.567	1456390_at	Ppp2ca	protein phosphatase 2a, catalytic subunit, alpha isoform
644	1.566	1418637_at	Etv3	ets variant gene 3
645	1.565	1433856_at	AW555814	expressed sequence AW555814
646	1.565	1428663_at	5133401H06Rik	RIKEN cDNA 5133401H06 gene
647	1.564	1425982_a_at	Wrn	Werner syndrome homolog (human)
648	1.564	1451042_a_at	Mina	myc induced nuclear antigen
649	1.561	1419211_s_at	4933424B01Rik	RIKEN cDNA 4933424B01 gene
650	1.557	1428331_at	2210016F16Rik	RIKEN cDNA 2210016F16 gene
651	1.554	1443800_at	Nif3l1	Ngg1 interacting factor 3-like 1 (S. pombe)
652	1.554	1449847_a_at	Col4a3bp	procollagen, type IV, alpha 3 (Goodpasture antigen) binding protein
653	1.552	1454679_at	D8Ertd457e	DNA segment, Chr 8, ERATO Doi 457, expressed
654	1.552	1430614_at	4632415K11Rik	RIKEN cDNA 4632415K11 gene
655	1.551	1418700_at	Lias	lipoic acid synthetase
656	1.551	1426133_a_at	1500032H18Rik	RIKEN cDNA 1500032H18 gene
657	1.548	1435001_at	Plaa	phospholipase A2, activating protein
658	1.547	1419661_at	1600012F09Rik	RIKEN cDNA 1600012F09 gene
659	1.546	1435139_at	Narg1	NMDA receptor-regulated gene 1
660	1.545	1452430_s_at	Sfrs1	splicing factor, arginine/serine-rich 1 (ASF/SF2)
661	1.544	1429073_at	2210015D19Rik	RIKEN cDNA 2210015D19 gene
662	1.542	1451077_at	Rpl5 /// LOC545265 /// LOC545304 /// LOC545478 /// LOC545858	ribosomal protein L5 /// similar to 60S ribosomal protein L5 /// similar to 60S ribosomal protein L5 /// similar to 60S ribosomal protein L5 /// similar to 60S ribosomal protein L5
663	1.541	1455357_x_at	Tomm20	translocase of outer mitochondrial membrane 20 homolog (yeast)
664	1.54	1416448_at	Itpa	inosine triphosphatase (nucleoside triphosphate pyrophosphatase)
665	1.539	1451738_at	Ogt	O-linked N-acetylglucosamine (GlcNAc) transferase (UDP-N-acetylglucosamine:polypeptide-N-acetylglucosaminyl transferase)
666	1.539	1437207_at	Rnf170	ring finger protein 170
667	1.539	1452254_at	Mtmr9	myotubularin related protein 9
668	1.538	1437354_at
669	1.537	1436020_at	D8Ertd457e	DNA segment, Chr 8, ERATO Doi 457, expressed
670	1.535	1421089_a_at	2610028A01Rik	RIKEN cDNA 2610028A01 gene
671	1.535	1420890_at	Hccs	holocytochrome c synthetase
672	1.535	1449981_a_at	Nat2	N-acetyltransferase 2 (arylamine N-acetyltransferase)
673	1.533	1424151_at	MGI:2385237	JTV1 gene
674	1.533	1425561_at	Trnt1	tRNA nucleotidyl transferase, CCA-adding, 1
675	1.532	1455020_at	Snx25	sorting nexin 25
676	1.531	1429683_at	5830472M02Rik	RIKEN cDNA 5830472M02 gene
677	1.53	1421054_at	Xpo4	exportin 4
678	1.53	1415949_at	Cpe	carboxypeptidase E
679	1.528	1448819_at	Eif2s2	eukaryotic translation initiation factor 2, subunit 2 (beta)
680	1.527	1427255_s_at	Zfp445	zinc finger protein 445
681	1.526	1434949_at	Armc8	armadillo repeat containing 8
682	1.526	1436241_s_at	Hira	histone cell cycle regulation defective homolog A (S. cerevisiae)
683	1.526	1434113_a_at	Xpmc2h	XPMC2 prevents mitotic catastrophe 2 homolog (Xenopus laevis)
684	1.524	1425820_x_at	Gpatc4	G patch domain containing 4
685	1.524	1434956_at
686	1.522	1416019_at	Dr1	down-regulator of transcription 1
687	1.521	1415672_at	Golga7	golgi autoantigen, golgin subfamily a, 7
688	1.521	1423617_at	2610019N19Rik /// Cog8	RIKEN cDNA 2610019N19 gene /// component of oligomeric golgi complex 8
689	1.52	1429383_at	Csnk1g3	casein kinase 1, gamma 3
690	1.518	1428468_at	3110043O21Rik	RIKEN cDNA 3110043O21 gene
691	1.515	1460236_at	Klk10	kallikrein 10
692	1.513	1420139_s_at	Hrb2	HIV-1 Rev binding protein 2
693	1.512	1450163_a_at	Wrn	Werner syndrome homolog (human)
694	1.51	1433766_at	C330023M02Rik	RIKEN cDNA C330023M02 gene
695	1.509	1424207_at	Smarca5	SWI/SNF related, matrix associated, actin dependent regulator of chromatin, subfamily a, member 5
696	1.507	1428624_at	2810482I07Rik	RIKEN cDNA 2810482I07 gene
697	1.504	1418721_at	Cops7b	COP9 (constitutive photomorphogenic) homolog, subunit 7b (Arabidopsis thaliana)
698	1.504	1423241_a_at	Tfdp1	transcription factor Dp 1
699	1.5	1426920_x_at	Itgb1	integrin beta 1 (fibronectin receptor beta)
700	1.5	1451888_a_at	Odz4	odd Oz/ten-m homolog 4 (Drosophila)
701	1.499	1428565_at	1300004G08Rik /// LOC545242	RIKEN cDNA 1300004G08 gene /// similar to hypothetical protein LOC65259
702	1.499	1460631_at	Ogt	O-linked N-acetylglucosamine (GlcNAc) transferase (UDP-N-acetylglucosamine:polypeptide-N-acetylglucosaminyl transferase)
703	1.499	1433482_a_at	Fubp1	far upstream element (FUSE) binding protein 1
704	1.498	1428294_at	Zfp259	zinc finger protein 259
705	1.497	1457059_at	B830013J05Rik	RIKEN cDNA B830013J05 gene
706	1.496	1442116_at	Gm1012	gene model 1012, (NCBI)
707	1.495	1454112_a_at	2410007P03Rik	RIKEN cDNA 2410007P03 gene
708	1.493	1417684_at	Thumpd3	THUMP domain containing 3
709	1.491	1454633_at	Etnk1	ethanolamine kinase 1
710	1.487	1426646_at	9130011J15Rik	RIKEN cDNA 9130011J15 gene
711	1.481	1436955_at	Tssc1	tumor suppressing subtransferable candidate 1
712	1.478	1426290_at	1500031M22Rik	RIKEN cDNA 1500031M22 gene
713	1.478	1424765_at	Eps15-rs	epidermal growth factor receptor pathway substrate 15, related sequence
714	1.477	1426995_a_at	Gfer	growth factor, erv1 (S. cerevisiae)-like (augmenter of liver regeneration)
715	1.477	1453949_s_at	Lypla1	lysophospholipase 1
716	1.477	1441235_at	Nup133	nucleoporin 133
717	1.476	1455076_a_at	4933424B01Rik	RIKEN cDNA 4933424B01 gene
718	1.475	1438520_at	Slc25a36	solute carrier family 25, member 36
719	1.474	1437832_x_at	Wars	tryptophanyl-tRNA synthetase
720	1.473	1431423_a_at	Med8	mediator of RNA polymerase II transcription, subunit 8 homolog (yeast)
721	1.473	1460716_a_at	Cbfb	core binding factor beta
722	1.472	1424117_at	BC056474	cDNA sequence BC056474
723	1.472	1428362_at	E130105L11Rik	RIKEN cDNA E130105L11 gene
724	1.469	1441793_at	Ppp1r11	Protein phosphatase 1, regulatory (inhibitor) subunit 11
725	1.463	1451638_s_at	Armc1	armadillo repeat containing 1
726	1.461	1429056_at	Narg1l	NMDA receptor regulated 1-like
727	1.45	1437080_s_at	Psmd11	proteasome (prosome, macropain) 26S subunit, non-ATPase, 11
728	1.449	1417873_at	Pwp1	PWP1 homolog (S. cerevisiae)
729	1.448	1424206_at	Smarca5	SWI/SNF related, matrix associated, actin dependent regulator of chromatin, subfamily a, member 5
730	1.447	1425404_a_at	2310014H19Rik	RIKEN cDNA 2310014H19 gene
731	1.446	1446957_s_at	BC004022	cDNA sequence BC004022
732	1.434	1433268_at	4930553M12Rik	RIKEN cDNA 4930553M12 gene
733	1.431	1416417_a_at	Ndufb7	NADH dehydrogenase (ubiquinone) 1 beta subcomplex, 7
734	1.431	1452852_at	Twistnb	TWIST neighbor
735	1.429	1423769_at	Ptcd2	pentatricopeptide repeat domain 2
736	1.429	1443103_at	D830046C22Rik	RIKEN cDNA D830046C22 gene
737	1.428	1415747_s_at	Riok3	RIO kinase 3 (yeast)
738	1.427	1429118_a_at	4930429M06Rik	RIKEN cDNA 4930429M06Rik
739	1.426	1424202_at	Seh1l	SEH1-like (S. cerevisiae
740	1.426	1418399_at	Kctd9	potassium channel tetramerisation domain containing 9
741	1.425	1415860_at	Kpna2	karyopherin (importin) alpha 2
742	1.423	1437217_at	Ankrd6	ankyrin repeat domain 6
743	1.422	1416070_a_at	Ddx18	DEAD (Asp-Glu-Ala-Asp) box polypeptide 18
744	1.422	1416071_at	Ddx18	DEAD (Asp-Glu-Ala-Asp) box polypeptide 18
745	1.421	1455855_x_at	Hnrpab	heterogeneous nuclear ribonucleoprotein A/B
746	1.416	1451110_at	Egln1	EGL nine homolog 1 (C. elegans)
747	1.416	1417912_at	0610009E20Rik	RIKEN cDNA 0610009E20 gene
748	1.415	1448597_at	Cstf1	cleavage stimulation factor, 3' pre-RNA, subunit 1
749	1.412	1423829_at	0910001A06Rik	RIKEN cDNA 0910001A06 gene
750	1.411	1439152_at	BC052066	cDNA sequence BC052066
751	1.41	1420091_s_at	Morc3	microrchidia 3
752	1.41	1428099_a_at	Sfrs1	splicing factor, arginine/serine-rich 1 (ASF/SF2)
753	1.406	1415723_at	Eif5	eukaryotic translation initiation factor 5
754	1.405	1425844_a_at	Rngtt	RNA guanylyltransferase and 5'-phosphatase
755	1.398	1440261_at	Ap4e1	adaptor-related protein complex AP-4, epsilon 1
756	1.398	1415783_at	Vps35	vacuolar protein sorting 35
757	1.39	1418543_s_at	D11Ertd707e	DNA segment, Chr 11, ERATO Doi 707, expressed
758	1.377	1457712_at	Chd8	chromodomain helicase DNA binding protein 8
