# Supplementary material for: Rrp1b, a New Candidate Susceptibility Gene for Breast Cancer Progression and Metastasis
Source: PLoS Genet. 2007 Nov 30;3(11):e214. doi: 10.1371/journal.pgen.0030214 (PMC2098807; doi:10.1371/journal.pgen.0030214)
Supplement: Table S8 — (181 KB XLS) [file pgen.0030214.st008.xls]

## Sheet: Sheet1
Table S8. Genes Down-Regulated by Ectopic Expression of Rrp1b in Mvt-1 Cells
	Fold difference of geom means (Transfected/Control cell lines)	Probe set	Gene symbol	Description
1	0.002	1430162_at	3830417A13Rik	RIKEN cDNA 3830417A13 gene
2	0.018	1415983_at	Lcp1	lymphocyte cytosolic protein 1
3	0.032	1418004_a_at	1810009M01Rik	RIKEN cDNA 1810009M01 gene
4	0.033	1448160_at	Lcp1	lymphocyte cytosolic protein 1
5	0.036	1416666_at	Serpine2	serine (or cysteine) proteinase inhibitor, clade E, member 2
6	0.043	1450678_at	Itgb2	integrin beta 2
7	0.045	1423909_at	0610011I04Rik	RIKEN cDNA 0610011I04 gene
8	0.049	1418664_at	Mpdz	multiple PDZ domain protein
9	0.058	1417848_at	MGI:2180715	glucocorticoid induced gene 1
10	0.062	1453152_at	Mamdc2	MAM domain containing 2
11	0.063	1434442_at	D5Ertd593e	DNA segment, Chr 5, ERATO Doi 593, expressed
12	0.063	1428891_at	9130213B05Rik	RIKEN cDNA 9130213B05 gene
13	0.066	1426858_at	Inhbb	inhibin beta-B
14	0.068	1434465_x_at	Vldlr	very low density lipoprotein receptor
15	0.073	1450107_a_at	Renbp	renin binding protein
16	0.074	1448303_at	Gpnmb	glycoprotein (transmembrane) nmb
17	0.075	1417061_at	Slc40a1	solute carrier family 40 (iron-regulated transporter), member 1
18	0.088	1451461_a_at	Aldoc	aldolase 3, C isoform
19	0.09	1434920_a_at	Evl	Ena-vasodilator stimulated phosphoprotein
20	0.094	1421063_s_at	Snrpn /// Snurf	small nuclear ribonucleoprotein N /// SNRPN upstream reading frame
21	0.097	1450044_at	Fzd7	frizzled homolog 7 (Drosophila)
22	0.1	1416855_at	Gas1	growth arrest specific 1
23	0.104	1434372_at
24	0.106	1436838_x_at	Cotl1	coactosin-like 1 (Dictyostelium)
25	0.112	1420851_at	Pard6g	par-6 partitioning defective 6 homolog gamma (C. elegans)
26	0.116	1449896_at	Mlph	melanophilin
27	0.116	1417900_a_at	Vldlr	very low density lipoprotein receptor
28	0.119	1434191_at	A530016O06Rik	RIKEN cDNA A530016O06 gene
29	0.124	1450455_s_at	Akr1c12	aldo-keto reductase family 1, member C12
30	0.125	1445597_s_at	Hrasls3	HRAS like suppressor 3
31	0.127	1418910_at	Bmp7	bone morphogenetic protein 7
32	0.132	1422000_at	Akr1c12	aldo-keto reductase family 1, member C12
33	0.132	1439345_at	Gpnmb	glycoprotein (transmembrane) nmb
34	0.135	1417292_at	Ifi47	interferon gamma inducible protein 47
35	0.136	1451611_at	Hrasls3	HRAS like suppressor 3
36	0.14	1424692_at	2810055F11Rik	RIKEN cDNA 2810055F11 gene
37	0.143	1438211_s_at	Dbp	D site albumin promoter binding protein
38	0.143	1417602_at	Per2	period homolog 2 (Drosophila)
39	0.146	1434914_at	Rab6b	RAB6B, member RAS oncogene family
40	0.147	1435758_at	B4galt6	UDP-Gal:betaGlcNAc beta 1,4-galactosyltransferase, polypeptide 6
41	0.148	1428394_at	Phyhd1 /// Lrrc8	phytanoyl-CoA dioxygenase domain containing 1 /// leucine rich repeat containing 8
42	0.15	1420903_at	St6galnac3	ST6 (alpha-N-acetyl-neuraminyl-2,3-beta-galactosyl-1,3)-N-acetylgalactosaminide alpha-2,6-sialyltransferase 3
43	0.15	1460329_at	B4galt6	UDP-Gal:betaGlcNAc beta 1,4-galactosyltransferase, polypeptide 6
44	0.151	1452145_at	H6pd	hexose-6-phosphate dehydrogenase (glucose 1-dehydrogenase)
45	0.153	1436425_at	Ankrd38	ankyrin repeat domain 38
46	0.153	1416046_a_at	Fuca2	fucosidase, alpha-L- 2, plasma
47	0.153	1435906_x_at	Gbp2	guanylate nucleotide binding protein 2
48	0.156	1429830_a_at	Cd59a	CD59a antigen
49	0.157	1429351_at	4930429H24Rik	RIKEN cDNA 4930429H24 gene
50	0.157	1455422_x_at	39329	septin 4
51	0.158	1416619_at	4632428N05Rik	RIKEN cDNA 4632428N05 gene
52	0.16	1429359_s_at	Rbpms	RNA binding protein gene with multiple splicing
53	0.161	1437284_at	Fzd1	frizzled homolog 1 (Drosophila)
54	0.163	1448729_a_at	39329	septin 4
55	0.164	1430051_at	4930486L24Rik	RIKEN cDNA 4930486L24 gene
56	0.167	1415947_at	Creg1	cellular repressor of E1A-stimulated genes 1
57	0.17	1427201_at	Mustn1	musculoskeletal, embryonic nuclear protein 1
58	0.171	1417872_at	Fhl1	four and a half LIM domains 1
59	0.172	1430388_a_at	Sulf2	sulfatase 2
60	0.172	1418752_at	Aldh3a1	aldehyde dehydrogenase family 3, subfamily A1
61	0.173	1415948_at	Creg1	cellular repressor of E1A-stimulated genes 1
62	0.174	1437161_x_at	Rbpms	RNA binding protein gene with multiple splicing
63	0.174	1436002_at	C230013L11Rik	RIKEN cDNA C230013L11 gene
64	0.176	1451054_at	Orm1	orosomucoid 1
65	0.18	1418240_at	Gbp2	guanylate nucleotide binding protein 2
66	0.182	1449303_at	Sesn3	sestrin 3
67	0.186	1434957_at	Cdon	cell adhesion molecule-related/down-regulated by oncogenes
68	0.196	1451804_a_at	Lrrc16	leucine rich repeat containing 16
69	0.197	1451793_at	4930429H24Rik	RIKEN cDNA 4930429H24 gene
70	0.198	1436068_at	Zbtb10	zinc finger and BTB domain containing 10
71	0.2	1424393_s_at	Adhfe1	alcohol dehydrogenase, iron containing, 1
72	0.2	1426971_at	Ube1l	ubiquitin-activating enzyme E1-like
73	0.202	1452935_at	LOC546143	hypothetical protein LOC546143
74	0.202	1418509_at	Cbr2	carbonyl reductase 2
75	0.203	1449519_at	Gadd45a	growth arrest and DNA-damage-inducible 45 alpha
76	0.203	1455106_a_at	Ckb	creatine kinase, brain
77	0.204	1428141_at	Gga2	golgi associated, gamma adaptin ear containing, ARF binding protein 2
78	0.205	1436544_at	Atp10d	ATPase, Class V, type 10D
79	0.205	1451204_at	4933425F03Rik	RIKEN cDNA 4933425F03 gene
80	0.206	1425652_s_at	Rbpms	RNA binding protein gene with multiple splicing
81	0.206	1453282_at	Cxadr	coxsackievirus and adenovirus receptor
82	0.207	1418359_at	Wbscr27	Williams Beuren syndrome chromosome region 27 (human)
83	0.208	1429012_at	Arhgef6	Rac/Cdc42 guanine nucleotide exchange factor (GEF) 6
84	0.209	1418174_at	Dbp	D site albumin promoter binding protein
85	0.214	1451290_at	Map1lc3a	microtubule-associated protein 1 light chain 3 alpha
86	0.216	1417009_at	C1r	complement component 1, r subcomponent
87	0.217	1424770_at	Cald1	caldesmon 1
88	0.221	1416188_at	Gm2a	GM2 ganglioside activator protein
89	0.222	1448471_a_at	Ctla2a	cytotoxic T lymphocyte-associated protein 2 alpha
90	0.223	1426743_at	MGI:2384914	Dip3 beta
91	0.224	1418099_at	Tnfrsf1b	tumor necrosis factor receptor superfamily, member 1b
92	0.228	1429028_at	Dock11	dedicator of cytokinesis 11
93	0.228	1438684_at	Nuak1	ZNUAK family, SNF1-like kinase, 1
94	0.23	1418569_at	Fblim1	filamin binding LIM protein 1
95	0.233	1442005_at	AW987390	expressed sequence AW987390
96	0.234	1418663_at	Mpdz	multiple PDZ domain protein
97	0.235	1454800_at	MGI:2674071	protein containing single MORN motif in testis
98	0.236	1416811_s_at	Ctla2a /// Ctla2b	cytotoxic T lymphocyte-associated protein 2 alpha /// cytotoxic T lymphocyte-associated protein 2 beta
99	0.237	1447602_x_at	Sulf2	sulfatase 2
100	0.237	1436067_at	Zbtb10	zinc finger and BTB domain containing 10
101	0.238	1417294_at	Akr7a5	aldo-keto reductase family 7, member A5 (aflatoxin aldehyde reductase)
102	0.239	1455048_at	Igsf3	immunoglobulin superfamily, member 3
103	0.24	1435043_at	Plcb1	phospholipase C, beta 1
104	0.241	1434089_at	Synpo	synaptopodin
105	0.241	1448494_at	Gas1	growth arrest specific 1
106	0.244	1453313_at	Sesn3	sestrin 3
107	0.246	1439087_a_at	1500004A08Rik	RIKEN cDNA 1500004A08 gene
108	0.246	1428547_at	Nt5e	5' nucleotidase, ecto
109	0.247	1417600_at	Slc15a2	solute carrier family 15 (H+/peptide transporter), member 2
110	0.249	1422645_at	Hfe	hemochromatosis
111	0.251	1417849_at	MGI:2180715	glucocorticoid induced gene 1
112	0.252	1436320_at		CDNA clone IMAGE:1328649
113	0.258	1426272_at	Lmbr1	limb region 1
114	0.259	1418346_at	Insl6	insulin-like 6
115	0.263	1427165_at	Il13ra1	interleukin 13 receptor, alpha 1
116	0.263	1417305_at	Apeg1	aortic preferentially expressed gene 1
117	0.264	1423680_at	Fads1	fatty acid desaturase 1
118	0.267	1449141_at	Fblim1	filamin binding LIM protein 1
119	0.269	1416411_at	Gstm2	glutathione S-transferase, mu 2
120	0.272	1451148_at	Pink1	PTEN induced putative kinase 1
121	0.273	1418710_at	Cd59a	CD59a antigen
122	0.273	1450696_at	Psmb9	proteosome (prosome, macropain) subunit, beta type 9 (large multifunctional protease 2)
123	0.274	1425895_a_at	Id1	inhibitor of DNA binding 1
124	0.275	1451775_s_at	Il13ra1	interleukin 13 receptor, alpha 1
125	0.276	1427164_at	Il13ra1	interleukin 13 receptor, alpha 1
126	0.278	1418981_at	Casp12	caspase 12
127	0.278	1433575_at	Sox4	SRY-box containing gene 4
128	0.278	1434172_at	Cnr1	cannabinoid receptor 1 (brain)
129	0.278	1432410_a_at	Bmp7	bone morphogenetic protein 7
130	0.278	1428343_at	Rcor3	REST corepressor 3
131	0.281	1454783_at	Il13ra1	interleukin 13 receptor, alpha 1
132	0.282	1452789_at	Snn	stannin
133	0.282	1428446_at	MGI:1913996	dynein 2 light intermediate chain
134	0.283	1424392_at	Adhfe1	alcohol dehydrogenase, iron containing, 1
135	0.284	1455582_at	C1qtnf1	C1q and tumor necrosis factor related protein 1
136	0.284	1419584_at	AI428795	expressed sequence AI428795
137	0.285	1447864_s_at	Pogk	pogo transposable element with KRAB domain
138	0.286	1452646_at	Trp53inp2	tumor protein p53 inducible nuclear protein 2
139	0.286	1429001_at	Pir	pirin
140	0.286	1449168_a_at	Akap2	A kinase (PRKA) anchor protein 2
141	0.288	1423753_at	Bambi	BMP and activin membrane-bound inhibitor, homolog (Xenopus laevis)
142	0.288	1436736_x_at	D0H4S114	DNA segment, human D4S114
143	0.289	1423298_at	Add3	adducin 3 (gamma)
144	0.29	1426574_a_at	Add3	adducin 3 (gamma)
145	0.291	1451450_at	2010011I20Rik	RIKEN cDNA 2010011I20 gene
146	0.291	1416441_at	MGI:1889205	plasma glutamate carboxypeptidase
147	0.292	1448241_at	Gm2a	GM2 ganglioside activator protein
148	0.292	1421791_at	Ang3	angiogenin, ribonuclease A family, member 3
149	0.293	1460617_s_at	Rab6b	RAB6B, member RAS oncogene family
150	0.293	1419978_s_at	D10Ertd610e	DNA segment, Chr 10, ERATO Doi 610, expressed
151	0.293	1419323_at	Padi1	peptidyl arginine deiminase, type I
152	0.294	1452352_at	Ctla2b	cytotoxic T lymphocyte-associated protein 2 beta
153	0.299	1435893_at	Vldlr	very low density lipoprotein receptor
154	0.299	1425225_at	Fcgr3a	Fc fragment of IgG, low affinity IIIa, receptor
155	0.3	1452330_a_at	Mxra8	matrix-remodelling associated 8
156	0.3	1428332_at	1500004A08Rik	RIKEN cDNA 1500004A08 gene
157	0.302	1448104_at	Aldh6a1	aldehyde dehydrogenase family 6, subfamily A1
158	0.303	1447883_x_at	Map1lc3a	microtubule-associated protein 1 light chain 3 alpha
159	0.303	1456133_x_at	Itgb5	integrin beta 5
160	0.305	1454685_at		Transcribed locus
161	0.305	1428695_at	9130227C08Rik	RIKEN cDNA 9130227C08 gene
162	0.305	1418243_at	Fcna	ficolin A
163	0.306	1455242_at	Foxp1	Forkhead box P1
164	0.307	1448664_a_at	Apeg1	aortic preferentially expressed gene 1
165	0.307	1435456_at	AI428795	expressed sequence AI428795
166	0.308	1453289_at	Eif2c4	eukaryotic translation initiation factor 2C, 4
167	0.311	1435222_at	Foxp1	forkhead box P1
168	0.311	1447260_at	H2-Bl /// LOC547349	histocompatibility 2, blastocyst /// similar to MHC class I antigen precursor
169	0.312	1419495_at	Immp2l	inner mitochondrial membrane peptidase 2-like (S. cerevisiae)
170	0.312	1429104_at	0610025L06Rik	RIKEN cDNA 0610025L06 gene
171	0.313	1448143_at	Aldh2	aldehyde dehydrogenase 2, mitochondrial
172	0.314	1435078_at	3526402J09Rik	RIKEN cDNA 3526402J09 gene
173	0.315	1436614_at	AI843639	expressed sequence AI843639
174	0.315	1417533_a_at	Itgb5	integrin beta 5
175	0.316	1418192_at	Mnt	max binding protein
176	0.318	1431429_a_at	Arl4	ADP-ribosylation factor-like 4
177	0.321	1454967_at	A930001N09Rik	RIKEN cDNA A930001N09 gene
178	0.322	1433804_at	Jak1	Janus kinase 1
179	0.323	1429053_at	1110012J17Rik	RIKEN cDNA 1110012J17 gene
180	0.325	1422178_a_at	Rab17	RAB17, member RAS oncogene family
181	0.327	1428758_at	1810054O13Rik	RIKEN cDNA 1810054O13 gene
182	0.327	1421840_at	Abca1	ATP-binding cassette, sub-family A (ABC1), member 1
183	0.328	1460273_a_at	Birc1b	baculoviral IAP repeat-containing 1b
184	0.33	1435776_at	LOC545365	similar to novel protein
185	0.33	1436515_at	E030004N02Rik	RIKEN cDNA E030004N02 gene
186	0.331	1450106_a_at	Evl	Ena-vasodilator stimulated phosphoprotein
187	0.331	1456005_a_at	Bcl2l11	BCL2-like 11 (apoptosis facilitator)
188	0.332	1428651_at	4930429H24Rik	RIKEN cDNA 4930429H24 gene
189	0.333	1449526_a_at	Gdpd3	glycerophosphodiester phosphodiesterase domain containing 3
190	0.333	1438081_at		Transcribed locus
191	0.334	1424988_at	Mylip	myosin regulatory light chain interacting protein
192	0.334	1423495_at	Decr2	2-4-dienoyl-Coenzyme A reductase 2, peroxisomal
193	0.335	1449271_a_at	Hebp2	heme binding protein 2
194	0.336	1423584_at	Igfbp7	insulin-like growth factor binding protein 7
195	0.336	1418072_at	Hist1h2bc	histone 1, H2bc
196	0.337	1422504_at	Glrb	glycine receptor, beta subunit
197	0.338	1417018_at	Efemp2	epidermal growth factor-containing fibulin-like extracellular matrix protein 2
198	0.339	1449454_at	Bst1	bone marrow stromal cell antigen 1
199	0.339	1423297_at	Add3	adducin 3 (gamma)
200	0.341	1430526_a_at	Smarca2	SWI/SNF related, matrix associated, actin dependent regulator of chromatin, subfamily a, member 2
201	0.342	1428207_at	Bcl7a	B-cell CLL/lymphoma 7A
202	0.342	1417534_at	Itgb5	integrin beta 5
203	0.343	1450626_at	Manba	mannosidase, beta A, lysosomal
204	0.343	1418412_at	Tpd52l1	tumor protein D52-like 1
205	0.343	1429387_at	Grap	GRB2-related adaptor protein
206	0.344	1441259_s_at	Wdr10	WD repeat domain 10
207	0.347	1421938_at	Serhl	serine hydrolase-like
208	0.347	1427692_a_at	Cask	calcium/calmodulin-dependent serine protein kinase (MAGUK family)
209	0.348	1439341_at	AK220484	cDNA sequence AK220484
210	0.348	1441937_s_at	Pink1	PTEN induced putative kinase 1
211	0.349	1418925_at	Celsr1	cadherin EGF LAG seven-pass G-type receptor 1
212	0.349	1425605_a_at	Lmbr1	limb region 1
213	0.35	1417010_at	Zfp238	zinc finger protein 238
214	0.351	1425534_at	Stau2	staufen (RNA binding protein) homolog 2 (Drosophila)
215	0.351	1449949_a_at	Cxadr	coxsackievirus and adenovirus receptor
216	0.352	1420772_a_at	Tsc22d3	TSC22 domain family 3
217	0.352	1449556_at	H2-T23	histocompatibility 2, T region locus 23
218	0.352	1417962_s_at	Ghr	growth hormone receptor
219	0.353	1449453_at	Bst1	bone marrow stromal cell antigen 1
220	0.354	1419402_at	Mns1	meiosis-specific nuclear structural protein 1
221	0.355	1431322_at	Igsf3	immunoglobulin superfamily, member 3
222	0.355	1435169_at	A930001N09Rik	RIKEN cDNA A930001N09 gene
223	0.355	1427050_at	5730420B22Rik	RIKEN cDNA 5730420B22 gene
224	0.356	1456393_at	2310002J21Rik	RIKEN cDNA 2310002J21 gene
225	0.356	1424413_at	Ogfrl1	opioid growth factor receptor-like 1
226	0.358	1423959_at	Ropn1l	ropporin 1-like
227	0.358	1455793_at	BC035537	cDNA sequence BC035537
228	0.358	1435092_at	Arl4	ADP-ribosylation factor-like 4
229	0.359	1456377_x_at	0610025L06Rik	RIKEN cDNA 0610025L06 gene
230	0.359	1417500_a_at	Tgm2	transglutaminase 2, C polypeptide
231	0.36	1428021_at	Mccc2	methylcrotonoyl-Coenzyme A carboxylase 2 (beta)
232	0.362	1423894_a_at	Dalrd3	DALR anticodon binding domain containing 3
233	0.362	1417706_at	Naglu	alpha-N-acetylglucosaminidase (Sanfilippo disease IIIB)
234	0.363	1451322_at	2310016A09Rik	RIKEN cDNA 2310016A09 gene
235	0.366	1454931_at	Cri2	CREBBP/EP300 inhibitory protein 2
236	0.367	1438183_x_at	Sdh1	sorbitol dehydrogenase 1
237	0.367	1455936_a_at	Rbpms	RNA binding protein gene with multiple splicing
238	0.367	1428513_at	Calcoco1	calcium binding and coiled coil domain 1
239	0.368	1435836_at	Pdk1	Pyruvate dehydrogenase kinase, isoenzyme 1
240	0.369	1455087_at	D7Ertd715e	DNA segment, Chr 7, ERATO Doi 715, expressed
241	0.369	1434002_at	Ches1	checkpoint supressor 1
242	0.369	1422184_a_at	Ak1	adenylate kinase 1
243	0.369	1424420_at	Ccpg1	cell cycle progression 1
244	0.371	1424768_at	Cald1	caldesmon 1
245	0.372	1421899_a_at	Mr1	major histocompatibility complex, class I-related
246	0.372	1416401_at	Kai1	kangai 1 (suppression of tumorigenicity 6, prostate)
247	0.372	1449442_at	Pex11a	peroxisomal biogenesis factor 11a
248	0.372	1449297_at	Casp12	caspase 12
249	0.373	1433837_at	8430408G22Rik	RIKEN cDNA 8430408G22 gene
250	0.373	1445574_at		Transcribed locus
251	0.374	1416289_at	Plod1	procollagen-lysine, 2-oxoglutarate 5-dioxygenase 1
252	0.374	1438477_a_at	Mcee	methylmalonyl CoA epimerase
253	0.374	1450784_at	Reck	reversion-inducing-cysteine-rich protein with kazal motifs
254	0.375	1435260_at	Sdccag8	Serologically defined colon cancer antigen 8
255	0.376	1433805_at	Jak1	Janus kinase 1
256	0.376	1436617_at	Cetn4	centrin 4
257	0.376	1455467_at		Similar to CG14142-PA
258	0.378	1421011_at	Dhrs8	dehydrogenase/reductase (SDR family) member 8
259	0.38	1435448_at	Bcl2l11	BCL2-like 11 (apoptosis facilitator)
260	0.381	1416522_a_at	Grcc10	gene rich cluster, C10 gene
261	0.381	1452416_at	Il6ra	interleukin 6 receptor, alpha
262	0.381	1445275_at		Transcribed locus
263	0.381	1423475_at	Cnnm2	cyclin M2
264	0.384	1418176_at	Vdr	vitamin D receptor
265	0.384	1429514_at	Ppap2b	phosphatidic acid phosphatase type 2B
266	0.384	1428115_a_at	Rab2b	RAB2B, member RAS oncogene family
267	0.386	1456412_a_at	MGI:1194899	putative phosphatase
268	0.387	1424168_a_at
269	0.387	1453960_a_at	Capzb	capping protein (actin filament) muscle Z-line, beta
270	0.387	1421140_a_at	Foxp1	forkhead box P1
271	0.388	1426624_a_at	Ypel3	yippee-like 3 (Drosophila)
272	0.388	1422438_at	Ephx1	epoxide hydrolase 1, microsomal
273	0.389	1425586_a_at	Mlph	melanophilin
274	0.389	1418962_at	1110005F07Rik	RIKEN cDNA 1110005F07 gene
275	0.389	1437829_s_at	Eef2k	eukaryotic elongation factor-2 kinase
276	0.39	1449520_at	AI428795	expressed sequence AI428795
277	0.39	1416002_x_at	Cotl1	coactosin-like 1 (Dictyostelium)
278	0.392	1432276_at	4930519F16Rik	RIKEN cDNA 4930519F16 gene
279	0.394	1424242_at	Bphl	biphenyl hydrolase-like (serine hydrolase, breast epithelial mucin-associated antigen)
280	0.394	1416630_at	Id3	inhibitor of DNA binding 3
281	0.395	1422965_at	Agtrap	angiotensin II, type I receptor-associated protein
282	0.395	1441944_s_at		Transcribed locus
283	0.396	1417259_a_at	Capzb	capping protein (actin filament) muscle Z-line, beta
284	0.396	1460623_at	Scap2	Src family associated phosphoprotein 2
285	0.397	1433819_s_at	Agpat3	1-acylglycerol-3-phosphate O-acyltransferase 3
286	0.397	1434642_at	Dhrs8	dehydrogenase/reductase (SDR family) member 8
287	0.398	1455049_at	Igsf3	immunoglobulin superfamily, member 3
288	0.398	1416354_at	Rbmx	RNA binding motif protein, X chromosome
289	0.399	1419767_at	Padi3	peptidyl arginine deiminase, type III
290	0.399	1454840_at	Mccc2	methylcrotonoyl-Coenzyme A carboxylase 2 (beta)
291	0.399	1448095_at		Transcribed locus
292	0.4	1448477_at	Chst12	carbohydrate sulfotransferase 12
293	0.401	1451364_at	Polr3gl	polymerase (RNA) III (DNA directed) polypeptide G like
294	0.401	1452527_a_at	P2rx4	purinergic receptor P2X, ligand-gated ion channel 4
295	0.401	1418175_at	Vdr	vitamin D receptor
296	0.403	1424354_at	1110007F12Rik	RIKEN cDNA 1110007F12 gene
297	0.403	1451361_a_at	BC027342	cDNA sequence BC027342
298	0.404	1416795_at	Cryl1	crystallin, lamda 1
299	0.404	1426734_at	BC022623	cDNA sequence BC022623
300	0.406	1416612_at	Cyp1b1	cytochrome P450, family 1, subfamily b, polypeptide 1
301	0.406	1427357_at	Cda	cytidine deaminase
302	0.406	1438294_at	Sca1	spinocerebellar ataxia 1 homolog (human)
303	0.406	1417635_at	Spa17	sperm autoantigenic protein 17
304	0.408	1449383_at	Adssl1	adenylosuccinate synthetase like 1
305	0.408	1429816_at	Armc3	armadillo repeat containing 3
306	0.408	1459850_x_at	Glrb	glycine receptor, beta subunit
307	0.408	1427321_s_at	Cxadr	coxsackievirus and adenovirus receptor
308	0.409	1417211_a_at	1110032A03Rik	RIKEN cDNA 1110032A03 gene
309	0.41	1424922_a_at	Brd4	bromodomain containing 4
310	0.41	1452024_a_at	Ldb1	LIM domain binding 1
311	0.41	1459896_at	Pogk	pogo transposable element with KRAB domain
312	0.411	1425525_a_at	P2rx4	purinergic receptor P2X, ligand-gated ion channel 4
313	0.412	1425533_a_at	Stau2	staufen (RNA binding protein) homolog 2 (Drosophila)
314	0.412	1437537_at	Casp9	caspase 9
315	0.413	1417501_at	Fbxo6b	F-box only protein 6b
316	0.414	1418840_at	Pdcd4	programmed cell death 4
317	0.414	1433571_at	A130038L21Rik	RIKEN cDNA A130038L21 gene
318	0.414	1417066_at	Cabc1	chaperone, ABC1 activity of bc1 complex like (S. pombe)
319	0.415	1424866_at	Usp43	ubiquitin specific protease 43
320	0.415	1435221_at	Foxp1	Forkhead box P1
321	0.417	1417879_at	Nenf	neuron derived neurotrophic factor
322	0.417	1451803_a_at	Vegfb	vascular endothelial growth factor B
323	0.418	1455558_at	Gm114	gene model 114, (NCBI)
324	0.418	1430421_a_at	BC010787	cDNA sequence BC010787
325	0.418	1458324_x_at		16 days embryo head cDNA, RIKEN full-length enriched library, clone:C130051K14 product:unknown EST, full insert sequence
326	0.419	1421027_a_at	Mef2c	myocyte enhancer factor 2C
327	0.42	1434784_s_at	D15Ertd405e	DNA segment, Chr 15, ERATO Doi 405, expressed
328	0.42	1421141_a_at	Foxp1	forkhead box P1
329	0.42	1439108_at	Mll5	myeloid/lymphoid or mixed-lineage leukemia 5
330	0.421	1425523_at	2600011C06Rik	RIKEN cDNA 2600011C06 gene
331	0.421	1450611_at	Orm3	orosomucoid 3
332	0.421	1418025_at	Bhlhb2	basic helix-loop-helix domain containing, class B2
333	0.421	1435485_at	C230096C10Rik	RIKEN cDNA C230096C10 gene
334	0.422	1426146_a_at	Chpt1	choline phosphotransferase 1
335	0.422	1454658_at	Ilvbl	ilvB (bacterial acetolactate synthase)-like
336	0.422	1456316_a_at	Acbd3	acyl-Coenzyme A binding domain containing 3
337	0.424	1452817_at	Smyd3	SET and MYND domain containing 3
338	0.424	1434034_at	Cerk	ceramide kinase
339	0.425	1426280_at	AV249152	expressed sequence AV249152
340	0.425	1435155_at	Cgn	cingulin
341	0.426	1425281_a_at	Tsc22d3	TSC22 domain family 3
342	0.426	1453913_a_at	Tap2	transporter 2, ATP-binding cassette, sub-family B (MDR/TAP)
343	0.427	1422293_a_at	Kctd1	potassium channel tetramerisation domain containing 1
344	0.427	1434783_at	D15Ertd405e	DNA segment, Chr 15, ERATO Doi 405, expressed
345	0.429	1434387_at	AI429612	expressed sequence AI429612
346	0.43	1435280_at	AI452195	expressed sequence AI452195
347	0.43	1452540_a_at	Hist1h2bc /// Hist1h2be /// Hist1h2bl /// Hist1h2bm /// Hist1h2bp	histone 1, H2bc /// histone 1, H2be /// histone 1, H2bl /// histone 1, H2bm /// histone 1, H2bp
348	0.431	1451912_a_at	Fgfrl1	fibroblast growth factor receptor-like 1
349	0.431	1429390_at	Acpl2	acid phosphatase-like 2
350	0.432	1416493_at	Ddost	dolichyl-di-phosphooligosaccharide-protein glycotransferase
351	0.432	1460328_at	Brd3	bromodomain containing 3
352	0.432	1453573_at	Hist1h3d	histone1, H3d
353	0.432	1439613_at	MGI:2660854	soluble adenylyl cyclase
354	0.432	1425801_x_at	Cotl1	coactosin-like 1 (Dictyostelium)
355	0.433	1433803_at	Jak1	Janus kinase 1
356	0.434	1436591_at	BC023744	cDNA sequence BC023744
357	0.434	1448410_at	Ube4b	ubiquitination factor E4B, UFD2 homolog (S. cerevisiae)
358	0.434	1416926_at	Trp53inp1	transformation related protein 53 inducible nuclear protein 1
359	0.435	1435142_at	SFT2 domain containing 2	SFT2 domain containing 2
360	0.435	1424694_at	2010011I20Rik	RIKEN cDNA 2010011I20 gene
361	0.435	1456026_at	8030451K01Rik	RIKEN cDNA 8030451K01 gene
362	0.436	1431339_a_at	Efhd2	EF hand domain containing 2
363	0.436	1455642_a_at	Tspan17	tetraspanin 17
364	0.437	1435141_at	SFT2 domain containing 2	SFT2 domain containing 2
365	0.437	1451574_at	Bcl9	B-cell CLL/lymphoma 9
366	0.438	1432472_a_at	Mccc2	methylcrotonoyl-Coenzyme A carboxylase 2 (beta)
367	0.438	1421571_a_at	Ly6c	lymphocyte antigen 6 complex, locus C
368	0.438	1434145_s_at	Serhl	serine hydrolase-like
369	0.44	1435994_at		Adult male corpus striatum cDNA, RIKEN full-length enriched library, clone:C030012J07 product:unknown EST, full insert sequence
370	0.441	1423963_at	Wdr26	WD repeat domain 26
371	0.441	1426584_a_at	Sdh1	sorbitol dehydrogenase 1
372	0.441	1427564_at	Diap2	diaphanous homolog 2 (Drosophila)
373	0.442	1417468_at	Nit1	nitrilase 1
374	0.442	1449013_at	Eef2k	eukaryotic elongation factor-2 kinase
375	0.442	1435716_x_at	Snrpn	small nuclear ribonucleoprotein N
376	0.442	1428372_at	St5	suppression of tumorigenicity 5
377	0.442	1450637_a_at	Aebp1	AE binding protein 1
378	0.443	1448605_at	Rhoc	ras homolog gene family, member C
379	0.443	1417034_at	Trappc6a	trafficking protein particle complex 6A
380	0.444	1447278_at	BC027092	cDNA sequence BC027092
381	0.444	1428326_s_at	Hrsp12	heat-responsive protein 12
382	0.445	1437403_at	E130306M17Rik	RIKEN cDNA E130306M17 gene
383	0.446	1424175_at	Tef	thyrotroph embryonic factor
384	0.447	1438255_at	Ches1	checkpoint supressor 1
385	0.447	1428791_at	Ube2h	ubiquitin-conjugating enzyme E2H
386	0.447	1422774_at	1700088E04Rik	RIKEN cDNA 1700088E04 gene
387	0.447	1417603_at	Per2	period homolog 2 (Drosophila)
388	0.447	1416572_at	Mmp14	matrix metalloproteinase 14 (membrane-inserted)
389	0.448	1418365_at	Ctsh	cathepsin H
390	0.448	1416958_at	Nr1d2	nuclear receptor subfamily 1, group D, member 2
391	0.448	1452668_x_at	Rab2b	RAB2B, member RAS oncogene family
392	0.451	1428692_at	1110033O09Rik	RIKEN cDNA 1110033O09 gene
393	0.452	1443897_at	Ddit3	DNA-damage inducible transcript 3
394	0.452	1429174_at	Wdr34	WD repeat domain 34
395	0.453	1448665_at	Dmd	dystrophin, muscular dystrophy
396	0.453	1455962_at	Hhat	hedgehog acyltransferase
397	0.454	1420731_a_at	Csrp2	cysteine and glycine-rich protein 2
398	0.454	1448908_at	Ppap2b	phosphatidic acid phosphatase type 2B
399	0.454	1433942_at	Myo6	myosin VI
400	0.454	1433672_at	4732479N06Rik	RIKEN cDNA 4732479N06 gene
401	0.454	1425476_at	Col4a5	procollagen, type IV, alpha 5
402	0.454	1448710_at	Cxcr4	chemokine (C-X-C motif) receptor 4
403	0.455	1419595_a_at	Ggh	gamma-glutamyl hydrolase
404	0.455	1416584_at	Man2b2	mannosidase 2, alpha B2
405	0.455	1449047_at	1600020H07Rik	RIKEN cDNA 1600020H07 gene
406	0.456	1451126_at	Maf1	MAF1 homolog (S. cerevisiae)
407	0.456	1448905_at	Nme3	expressed in non-metastatic cells 3
408	0.456	1422473_at	Pde4b	phosphodiesterase 4B, cAMP specific
409	0.457	1435348_at	D930009K15Rik	RIKEN cDNA D930009K15 gene
410	0.457	1448951_at	Tnfrsf1b	tumor necrosis factor receptor superfamily, member 1b
411	0.457	1428342_at	Rcor3	REST corepressor 3
412	0.458	1418890_a_at	Rab3d	RAB3D, member RAS oncogene family
413	0.458	1452106_at	Npnt	nephronectin
414	0.459	1435763_at	Tbc1d16	TBC1 domain family, member 16
415	0.459	1419283_s_at	Tns1	tensin 1
416	0.459	1433593_at	Ypel5	yippee-like 5 (Drosophila)
417	0.46	1416831_at	Neu1	neuraminidase 1
418	0.46	1434301_at	D330050I23Rik	RIKEN cDNA D330050I23 gene
419	0.461	1420375_at	Kif3a	kinesin family member 3A
420	0.461	1452349_x_at	Ifi205 /// Mnda	interferon activated gene 205 /// myeloid cell nuclear differentiation antigen
421	0.461	1424503_at	Rab22a	RAB22A, member RAS oncogene family
422	0.462	1449147_at	Chst1	carbohydrate (keratan sulfate Gal-6) sulfotransferase 1
423	0.464	1433668_at	Pnrc1	proline-rich nuclear receptor coactivator 1
424	0.464	1438678_at	1500011K16Rik	RIKEN cDNA 1500011K16 gene
425	0.464	1423549_at	Slc1a4	solute carrier family 1 (glutamate/neutral amino acid transporter), member 4
426	0.465	1424414_at	Ogfrl1	opioid growth factor receptor-like 1
427	0.465	1436795_at	9630058J23Rik	RIKEN cDNA 9630058J23 gene
428	0.466	1450839_at	D0H4S114	DNA segment, human D4S114
429	0.466	1450378_at	Tapbp	TAP binding protein
430	0.467	1419365_at	Pex11a	peroxisomal biogenesis factor 11a
431	0.467	1432073_at	1700113I22Rik	RIKEN cDNA 1700113I22 gene
432	0.467	1424951_at	Baiap2l1	BAI1-associated protein 2-like 1
433	0.468	1460307_at	Akt3	thymoma viral proto-oncogene 3
434	0.468	1424412_at	Ogfrl1	opioid growth factor receptor-like 1
435	0.468	1435479_at
436	0.469	1428270_at	Glt8d1	glycosyltransferase 8 domain containing 1
437	0.469	1421402_at	Mta3	metastasis associated 3
438	0.469	1438315_x_at	Akr7a5	aldo-keto reductase family 7, member A5 (aflatoxin aldehyde reductase)
439	0.469	1448383_at	Mmp14	matrix metalloproteinase 14 (membrane-inserted)
440	0.47	1417298_at	Ebpl	emopamil binding protein-like
441	0.47	1434223_at	1810007P19Rik	RIKEN cDNA 1810007P19 gene
442	0.471	1439107_a_at	Mll5	myeloid/lymphoid or mixed-lineage leukemia 5
443	0.471	1417133_at	Pmp22	peripheral myelin protein
444	0.471	1417101_at	Hspa2	heat shock protein 2
445	0.472	1451526_at	Arhgap12	Rho GTPase activating protein 12
446	0.473	1428619_at	2310005N03Rik	RIKEN cDNA 2310005N03 gene
447	0.473	1440984_at	5830435C13Rik	RIKEN cDNA 5830435C13 gene
448	0.473	1435589_at	AI842788	expressed sequence AI842788
449	0.473	1448330_at	Gstm1	glutathione S-transferase, mu 1
450	0.474	1418448_at	Rras	Harvey rat sarcoma oncogene, subgroup R
451	0.474	1417987_at	Btd	biotinidase
452	0.474	1435449_at	Bcl2l11	BCL2-like 11 (apoptosis facilitator)
453	0.475	1426992_at	Xpr1	xenotropic and polytropic retrovirus receptor 1
454	0.475	1428467_at	Tardbp	TAR DNA binding protein
455	0.475	1434133_s_at
456	0.475	1426383_at	Cry2	cryptochrome 2 (photolyase-like)
457	0.476	1453173_at	2310005E10Rik	RIKEN cDNA 2310005E10 gene
458	0.476	1428650_at	Tns1	tensin 1
459	0.476	1416798_a_at	Nme4	expressed in non-metastatic cells 4, protein
460	0.477	1434567_at	4732496O08Rik	RIKEN cDNA 4732496O08 gene
461	0.477	1422078_at	Akt3	thymoma viral proto-oncogene 3
462	0.477	1418573_a_at	Raly	hnRNP-associated with lethal yellow
463	0.478	1435879_at	Akt3	thymoma viral proto-oncogene 3
464	0.478	1416808_at	Nid1	nidogen 1
465	0.48	1452882_at	Pgrmc2	progesterone receptor membrane component 2
466	0.48	1448407_at	4632428N05Rik	RIKEN cDNA 4632428N05 gene
467	0.48	1451326_at	1810013B01Rik	RIKEN cDNA 1810013B01 gene
468	0.481	1416418_at	Gabarapl1	gamma-aminobutyric acid (GABA(A)) receptor-associated protein-like 1
469	0.481	1432499_a_at	Ube4b	ubiquitination factor E4B, UFD2 homolog (S. cerevisiae)
470	0.482	1415972_at	Marcks	myristoylated alanine rich protein kinase C substrate
471	0.482	1428852_at	Dock3	dedicator of cyto-kinesis 3
472	0.483	1460387_a_at	Ysg2	yolk sac gene 2
473	0.483	1418818_at	Aqp5	aquaporin 5
474	0.484	1428983_at	Scx	scleraxis
475	0.485	1453741_x_at	D1Ertd396e	DNA segment, Chr 1, ERATO Doi 396, expressed
476	0.485	1452251_at	Nbea	neurobeachin
477	0.486	1416344_at	Lamp2	lysosomal membrane glycoprotein 2
478	0.486	1428340_s_at	Atp13a2	ATPase type 13A2
479	0.487	1419053_at	Pex14	peroxisomal biogenesis factor 14
480	0.487	1450967_at	4933428I03Rik	RIKEN cDNA 4933428I03 gene
481	0.487	1433501_at	Ctso	cathepsin O
482	0.487	1425616_a_at	2410005K17Rik	RIKEN cDNA 2410005K17 gene
483	0.488	1431042_at	Paqr8	progestin and adipoQ receptor family member VIII
484	0.488	1417636_at	Slc6a9	solute carrier family 6 (neurotransmitter transporter, glycine), member 9
485	0.488	1418895_at	Scap2	src family associated phosphoprotein 2
486	0.49	1418252_at	Padi2	peptidyl arginine deiminase, type II
487	0.49	1422731_at	Limd1	LIM domains containing 1
488	0.49	1456480_at	9330186A19Rik	RIKEN cDNA 9330186A19 gene
489	0.491	1419668_at	Sgcb	sarcoglycan, beta (dystrophin-associated glycoprotein)
490	0.491	1426855_at	D10Ertd610e	DNA segment, Chr 10, ERATO Doi 610, expressed
491	0.491	1421830_at	Ak3l1	adenylate kinase 3 alpha-like 1
492	0.492	1433558_at	Dab2ip	disabled homolog 2 (Drosophila) interacting protein
493	0.494	1433468_at	6430527G18Rik	RIKEN cDNA 6430527G18 gene
494	0.495	1432750_at	2810409C01Rik	RIKEN cDNA 2810409C01 gene
495	0.495	1450187_a_at	Galt	galactose-1-phosphate uridyl transferase
496	0.496	1424640_at	Arl10b	ADP-ribosylation factor-like 10B
497	0.497	1448131_at	Mfn2	mitofusin 2
498	0.497	1435498_at	Arfip2	ADP-ribosylation factor interacting protein 2
499	0.498	1437785_at	Adamts9	a disintegrin-like and metalloprotease (reprolysin type) with thrombospondin type 1 motif, 9
500	0.498	1416195_at	MGI:1194899	putative phosphatase
501	0.498	1452137_at	Acbd3	acyl-Coenzyme A binding domain containing 3
502	0.498	1423889_at	MGC5739	RIKEN cDNA 1700121I08 gene
503	0.499	1434566_a_at	4732496O08Rik	RIKEN cDNA 4732496O08 gene
504	0.499	1460367_at	Hbp1	high mobility group box transcription factor 1
505	0.499	1417423_at	Grina	glutamate receptor, ionotropic, N-methyl D-asparate-associated protein 1 (glutamate binding)
506	0.499	1421142_s_at	Foxp1	forkhead box P1
507	0.5	1421898_a_at	Mr1	major histocompatibility complex, class I-related
508	0.5	1419582_at	Cyp2c55	cytochrome P450, family 2, subfamily c, polypeptide 55
509	0.5	1434643_at	Tbl1x	transducin (beta)-like 1 X-linked
510	0.5	1416846_a_at	Pdzrn3	PDZ domain containing RING finger 3
511	0.501	1460675_at	Igsf8	immunoglobulin superfamily, member 8
512	0.501	1448490_at	Adck4	aarF domain containing kinase 4
513	0.501	1417307_at	Dmd	dystrophin, muscular dystrophy
514	0.501	1433616_a_at	2310028O11Rik	RIKEN cDNA 2310028O11 gene
515	0.502	1417505_s_at	Il11ra1 /// Il11ra2	interleukin 11 receptor, alpha chain 1 /// interleukin 11 receptor, alpha chain 2
516	0.502	1451096_at	Ndufs2	NADH dehydrogenase (ubiquinone) Fe-S protein 2
517	0.502	1460241_a_at	St3gal5	ST3 beta-galactoside alpha-2,3-sialyltransferase 5
518	0.502	1421861_at	Clstn1	calsyntenin 1
519	0.502	1437122_at	Bcl2	B-cell leukemia/lymphoma 2
520	0.502	1454988_s_at	Rab22a	RAB22A, member RAS oncogene family
521	0.502	1431792_a_at	Stk11ip	serine/threonine kinase 11 interacting protein
522	0.503	1422478_a_at	Acas2	acetyl-Coenzyme A synthetase 2 (ADP forming)
523	0.505	1416419_s_at	Gabarapl1	gamma-aminobutyric acid (GABA(A)) receptor-associated protein-like 1
524	0.505	1418942_at	Ccdc2	coiled-coil domain containing 2
525	0.505	1455721_at	Gspt2	G1 to S phase transition 2
526	0.506	1419927_s_at	Rabif	RAB interacting factor
527	0.506	1425636_at	Hhat	hedgehog acyltransferase
528	0.506	1435976_at
529	0.506	1416303_at	Litaf	LPS-induced TN factor
530	0.507	1423748_at	Pdk1	pyruvate dehydrogenase kinase, isoenzyme 1
531	0.507	1435930_at	Zfp291	zinc finger protein 291
532	0.508	1434441_at		Mus musculus, clone IMAGE:4015738, mRNA
533	0.509	1416593_at	Glrx1	glutaredoxin 1 (thioltransferase)
534	0.509	1453312_at	Iqwd1	IQ motif and WD repeats 1
535	0.51	1418317_at	Lhx2	LIM homeobox protein 2
536	0.51	1435772_at	Kif21b	kinesin family member 21B
537	0.51	1448370_at	Ulk1	Unc-51 like kinase 1 (C. elegans)
538	0.512	1423962_at	Wdr26	WD repeat domain 26
539	0.512	1417455_at	Tgfb3	transforming growth factor, beta 3
540	0.512	1427604_a_at	Atp9a	ATPase, class II, type 9A
541	0.513	1416425_at	Pex19	peroxisome biogenesis factor 19
542	0.513	1424595_at	F11r	F11 receptor
543	0.513	1415727_at	Apoa1bp	apolipoprotein A-I binding protein
544	0.513	1416315_at	Abhd4	abhydrolase domain containing 4
545	0.513	1416416_x_at	Gstm1	glutathione S-transferase, mu 1
546	0.514	1438061_at	4930523C07Rik	RIKEN cDNA 4930523C07 gene
547	0.514	1425475_at	Col4a5	procollagen, type IV, alpha 5
548	0.515	1453071_s_at	Kdelc2	KDEL (Lys-Asp-Glu-Leu) containing 2
549	0.515	1423223_a_at	Prdx6	peroxiredoxin 6
550	0.515	1434427_a_at	Rnf157	ring finger protein 157
551	0.515	1434451_at	2900016G23Rik	RIKEN cDNA 2900016G23 gene
552	0.516	1416766_at	Mosc2	MOCO sulphurase C-terminal domain containing 2
553	0.517	1439965_at		Transcribed locus
554	0.517	1452271_at	Xpr1	xenotropic and polytropic retrovirus receptor 1
555	0.517	1428168_at	Mpzl1	myelin protein zero-like 1
556	0.517	1429024_at	1110018J23Rik	RIKEN cDNA 1110018J23 gene
557	0.517	1431126_a_at	0610011F06Rik	RIKEN cDNA 0610011F06 gene
558	0.518	1452124_at	Ank3 /// 2900054D09Rik	ankyrin 3, epithelial /// RIKEN cDNA 2900054D09 gene
559	0.518	1425196_a_at	Hint2	histidine triad nucleotide binding protein 2
560	0.518	1435676_at	BC027092	cDNA sequence BC027092
561	0.518	1455669_at	Wdr19	WD repeat domain 19
562	0.518	1460634_at	Ralgds	ral guanine nucleotide dissociation stimulator
563	0.518	1453159_at	Efhc1	EF-hand domain (C-terminal) containing 1
564	0.519	1431469_a_at	Cxxc5	CXXC finger 5
565	0.52	1437103_at	C330012H03Rik	RIKEN cDNA C330012H03 gene
566	0.52	1424213_at	1200002M06Rik	RIKEN cDNA 1200002M06 gene
567	0.52	1419298_at	Pon3	paraoxonase 3
568	0.52	1449363_at	Atf3	activating transcription factor 3
569	0.521	1417756_a_at	Lsp1	lymphocyte specific 1
570	0.521	1439649_at	Adc	arginine decarboxylase
571	0.522	1438416_at	Thrap5	thyroid hormone receptor associated protein 5
572	0.522	1436038_a_at	Dscr5	Down syndrome critical region homolog 5 (human)
573	0.522	1436818_a_at	Msi2h	Musashi homolog 2 (Drosophila)
574	0.522	1438415_s_at	Yipf2	Yip1 domain family, member 2
575	0.523	1424894_at	Rab13	RAB13, member RAS oncogene family
576	0.523	1436318_at	Tardbp	TAR DNA binding protein
577	0.523	1451357_at	E130307M08Rik	RIKEN cDNA E130307M08 gene
578	0.524	1417435_at	Large	like-glycosyltransferase
579	0.524	1455044_at	Tmem44	transmembrane protein 44
580	0.525	1449376_at	Nicn1	nicolin 1
581	0.525	1428769_at	Tatdn3	TatD DNase domain containing 3
582	0.526	1448332_at	Pex19	peroxisome biogenesis factor 19
583	0.526	1449841_at	Kif3a	kinesin family member 3A
584	0.526	1424616_s_at
585	0.527	1433518_at	Lcmt2	leucine carboxyl methyltransferase 2
586	0.528	1416373_at	Nfs1	nitrogen fixation gene 1 (S. cerevisiae)
587	0.528	1437398_a_at	Aldh9a1	aldehyde dehydrogenase 9, subfamily A1
588	0.528	1417557_at	Ubxd1	UBX domain containing 1
589	0.529	1420046_s_at	Maf1	MAF1 homolog (S. cerevisiae)
590	0.529	1441967_at	BC023835	cDNA sequence, BC023835
591	0.529	1437657_at	Zfp291	zinc finger protein 291
592	0.529	1438010_at	D4Ertd429e	DNA segment, Chr 4, ERATO Doi 429, expressed
593	0.529	1423038_at	Stx6	syntaxin 6
594	0.529	1423068_at	4930553F24Rik	RIKEN cDNA 493055F24Rik
595	0.529	1443832_s_at	Sdpr	serum deprivation response
596	0.53	1417272_at	9130005N14Rik	RIKEN cDNA 9130005N14 gene
597	0.53	1431694_a_at	Ctnnbip1	catenin beta interacting protein 1
598	0.53	1419712_at	Il3ra	interleukin 3 receptor, alpha chain
599	0.531	1451893_s_at	Magi1	membrane associated guanylate kinase, WW and PDZ domain containing 1
600	0.531	1456756_at	E430016P22Rik	RIKEN cDNA E430016P22 gene
601	0.532	1424614_at	MGI:2385286	FGF receptor activating protein 1
602	0.532	1429065_at	1200009F10Rik	RIKEN cDNA 1200009F10 gene
603	0.533	1423587_a_at	Exosc10	exosome component 10
604	0.534	1428516_a_at	Spata11	spermatogenesis associated 11
605	0.534	1440825_s_at	1700009P13Rik	RIKEN cDNA 1700009P13 gene
606	0.534	1438401_at	Ubn1	Ubinuclein 1
607	0.534	1460180_at	Hexb	hexosaminidase B
608	0.535	1453004_at	3110004L20Rik	RIKEN cDNA 3110004L20 gene
609	0.535	1426715_s_at	D11Ertd18e	DNA segment, Chr 11, ERATO Doi 18, expressed
610	0.535	1415874_at	Spry1	sprouty homolog 1 (Drosophila)
611	0.536	1455440_at	AI850629	Expressed sequence AI850629
612	0.536	1418217_at	Nme7	non-metastatic cells 7, protein expressed in
613	0.537	1424054_at	Btbd2	BTB (POZ) domain containing 2
614	0.538	1417227_at	Mccc1	methylcrotonoyl-Coenzyme A carboxylase 1 (alpha)
615	0.538	1428117_x_at
616	0.539	1418318_at	Rnf128	ring finger protein 128
617	0.54	1432143_a_at	Hbp1	high mobility group box transcription factor 1
618	0.541	1439017_x_at	Adipor1	adiponectin receptor 1
619	0.541	1455604_at	LOC545325	hypothetical protein LOC545325
620	0.541	1419330_a_at	Gpa33	glycoprotein A33 (transmembrane)
621	0.542	1427430_at	AI848100	expressed sequence AI848100
622	0.542	1418000_a_at	Itm2b	integral membrane protein 2B
623	0.542	1424263_at	2810003C17Rik	RIKEN cDNA 2810003C17 gene
624	0.542	1437421_at	6330509M05Rik	RIKEN cDNA 6330509M05 gene
625	0.542	1418005_at	Sdhb	succinate dehydrogenase complex, subunit B, iron sulfur (Ip)
626	0.543	1427385_s_at	Actn1	actinin, alpha 1
627	0.544	1433895_at	2310003P10Rik	RIKEN cDNA 2310003P10 gene
628	0.544	1435634_at	A030012M09Rik	RIKEN cDNA A030012M09 gene
629	0.544	1434177_at	Ece1	endothelin converting enzyme 1
630	0.545	1449410_a_at	Gas5	growth arrest specific 5
631	0.545	1437149_at	Slc6a6	solute carrier family 6 (neurotransmitter transporter, taurine), member 6
632	0.545	1416778_at	Sdpr	serum deprivation response
633	0.545	1459274_at		Transcribed locus
634	0.546	1421018_at	1110018J18Rik	RIKEN cDNA 1110018J18 gene
635	0.546	1451782_a_at	Slc29a1	solute carrier family 29 (nucleoside transporters), member 1
636	0.546	1415904_at	Lpl	lipoprotein lipase
637	0.547	1423141_at	Lip1	lysosomal acid lipase 1
638	0.547	1425565_at	Rest	RE1-silencing transcription factor
639	0.548	1419156_at	Sox4	SRY-box containing gene 4
640	0.549	1416332_at	Cirbp	cold inducible RNA binding protein
641	0.549	1454021_a_at	Exosc10	exosome component 10
642	0.549	1424835_at	Gstm4	glutathione S-transferase, mu 4
643	0.55	1417472_at	Myh9	myosin, heavy polypeptide 9, non-muscle
644	0.55	1416942_at	MGI:1933403	type 1 tumor necrosis factor receptor shedding aminopeptidase regulator
645	0.552	1451311_a_at	Adipor1	adiponectin receptor 1
646	0.552	1415984_at	Acadm	acetyl-Coenzyme A dehydrogenase, medium chain
647	0.552	1452620_at	Pck2	phosphoenolpyruvate carboxykinase 2 (mitochondrial)
648	0.552	1424852_at	Mef2c	myocyte enhancer factor 2C
649	0.552	1424745_at	2900006B13Rik	RIKEN cDNA 2900006B13 gene
650	0.553	1448559_at	Flot1	flotillin 1
651	0.553	1422938_at	Bcl2	B-cell leukemia/lymphoma 2
652	0.553	1416654_at	Slc31a2	solute carrier family 31, member 2
653	0.553	1454034_a_at	Usp21	ubiquitin specific protease 21
654	0.553	1444396_at	Trp53inp2	Tumor protein p53 inducible nuclear protein 2
655	0.553	1416779_at	Sdpr	serum deprivation response
656	0.553	1418671_at	Capn5	calpain 5
657	0.554	1427240_at	Dock6	dedicator of cytokinesis 6
658	0.554	1423966_at	Cd99l2	Cd99 antigen-like 2
659	0.554	1451891_a_at	Dysf	dysferlin
660	0.555	1456641_at	1190007F08Rik	RIKEN cDNA 1190007F08 gene
661	0.555	1433795_at	Tgfbr3	transforming growth factor, beta receptor III
662	0.555	1419286_s_at	Cdv1	carnitine deficiency-associated gene expressed in ventricle 1
663	0.555	1418474_at	1500005A01Rik	RIKEN cDNA 1500005A01 gene
664	0.556	1433812_at	Lix1l	Lix1-like
665	0.556	1428805_at	Slc35e3	solute carrier family 35, member E3
666	0.556	1431190_x_at	Fahd2a	fumarylacetoacetate hydrolase domain containing 2A
667	0.556	1449470_at	Dlx1	distal-less homeobox 1
668	0.556	1428647_at	2310056B04Rik	RIKEN cDNA 2310056B04 gene
669	0.557	1424646_at	Uckl1	uridine-cytidine kinase 1-like 1
670	0.557	1456586_x_at	Mvp	major vault protein
671	0.557	1428731_at	Usp54	ubiquitin specific protease 54
672	0.557	1431680_a_at	Ptprk	protein tyrosine phosphatase, receptor type, K
673	0.557	1449084_s_at	Sh3d19	SH3 domain protein D19
674	0.557	1448956_at	Stard10	START domain containing 10
675	0.557	1453365_at	Rabgap1l	RAB GTPase activating protein 1-like
676	0.558	1437572_at	Dcp1b	DCP1 decapping enzyme homolog b (S. cerevisiae)
677	0.558	1436596_at	H2afv	H2A histone family, member V
678	0.558	1449418_s_at	Fbxo36	F-box only protein 36
679	0.558	1452589_at	Ptk7	PTK7 protein tyrosine kinase 7
680	0.559	1419667_at	Sgcb	sarcoglycan, beta (dystrophin-associated glycoprotein)
681	0.559	1432494_a_at	1700019E19Rik	RIKEN cDNA 1700019E19 gene
682	0.559	1420630_at	8430419L09Rik	RIKEN cDNA 8430419L09 gene
683	0.56	1425684_at	2310005E10Rik	RIKEN cDNA 2310005E10 gene
684	0.562	1451196_at	Ypel5	yippee-like 5 (Drosophila)
685	0.562	1427927_at	AW049829	expressed sequence AW049829
686	0.562	1420387_at	Mpv17	Mpv17 transgene, kidney disease mutant
687	0.562	1448377_at	Slpi	secretory leukocyte protease inhibitor
688	0.563	1423489_at	Mmd	monocyte to macrophage differentiation-associated
689	0.563	1429896_at	5830408B19Rik	RIKEN cDNA 5830408B19 gene
690	0.564	1425607_at	Hlcs	holocarboxylase synthetase (biotin- [propriony-Coenzyme A-carboxylase (ATP-hydrolysing)] ligase)
691	0.564	1455038_at		Transcribed locus
692	0.565	1435478_at	Wdr26	WD repeat domain 26
693	0.565	1449554_at	Tle3	transducin-like enhancer of split 3, homolog of Drosophila E(spl)
694	0.565	1455761_at	2310009B15Rik /// LOC545365	RIKEN cDNA 2310009B15 gene /// similar to novel protein
695	0.565	1450769_s_at	Stard5	StAR-related lipid transfer (START) domain containing 5
696	0.566	1418749_at	BC003498	cDNA sequence BC00398
697	0.566	1448630_a_at	Sdhc	succinate dehydrogenase complex, subunit C, integral membrane protein
698	0.566	1425699_a_at	Abhd14a	abhydrolase domain containing 14A
699	0.566	1435549_at	Trpm4	transient receptor potential cation channel, subfamily M, member 4
700	0.567	1439160_at	4732496O08Rik	RIKEN cDNA 4732496O08 gene
701	0.567	1448067_at	AW011956	expressed sequence AW011956
702	0.567	1452667_at	Rab2b	RAB2B, member RAS oncogene family
703	0.568	1435473_at	Gm347	gene model 347, (NCBI)
704	0.568	1460436_at	Ndst1	N-deacetylase/N-sulfotransferase (heparan glucosaminyl) 1
705	0.568	1452370_s_at	B230208H17Rik	RIKEN cDNA B230208H17 gene
706	0.569	1456767_at	Lrfn3	leucine rich repeat and fibronectin type III domain containing 3
707	0.569	1431431_a_at	Nfs1	nitrogen fixation gene 1 (S. cerevisiae)
708	0.569	1440771_at	Zkscan1	zinc finger with KRAB and SCAN domains 1
709	0.569	1435475_at	Lman2l	lectin, mannose-binding 2-like
710	0.57	1416946_a_at	Acaa1 /// MGC29978	acetyl-Coenzyme A acyltransferase 1 /// 3-ketoacyl-CoA thiolase B
711	0.571	1448747_at	Fbxo32	F-box only protein 32
712	0.572	1429321_at	Rnf149	ring finger protein 149
713	0.572	1424615_at	MGI:2385286	FGF receptor activating protein 1
714	0.572	1422563_at	Crry	complement receptor related protein
715	0.572	1415973_at	Marcks	Myristoylated alanine rich protein kinase C substrate
716	0.572	1435679_at	Optn	optineurin
717	0.572	1426897_at	Rcc2	regulator of chromosome condensation 2
718	0.573	1438971_x_at	Ube2h	ubiquitin-conjugating enzyme E2H
719	0.574	1424695_at	2010011I20Rik	RIKEN cDNA 2010011I20 gene
720	0.574	1443881_at	Pofut1	Protein O-fucosyltransferase 1
721	0.575	1435596_at	A530088I07Rik	RIKEN cDNA A530088I07 gene
722	0.575	1452621_at	Pcbd2	pterin 4 alpha carbinolamine dehydratase/dimerization cofactor of hepatocyte nuclear factor 1 alpha (TCF1) 2
723	0.576	1418632_at	Ube2h	ubiquitin-conjugating enzyme E2H
724	0.576	1419291_x_at	Gas5	growth arrest specific 5
725	0.576	1435346_at	2310043N13Rik	RIKEN cDNA 2310043N13 gene
726	0.577	1421873_s_at	Rab24	RAB24, member RAS oncogene family
727	0.577	1451381_at	1810020D17Rik	RIKEN cDNA 1810020D17 gene
728	0.577	1436866_at	Efna5	ephrin A5
729	0.577	1417932_at	Il18	interleukin 18
730	0.578	1419456_at	Dcxr	dicarbonyl L-xylulose reductase
731	0.578	1416430_at	Cat	catalase
732	0.578	1415971_at	Marcks	myristoylated alanine rich protein kinase C substrate
733	0.579	1444503_at	Gbas	Glioblastoma amplified sequence
734	0.579	1434134_at	Wdr42a	WD repeat domain 42A
735	0.58	1452734_at	Rnaset2	ribonuclease T2
736	0.58	1428382_at	Smarcc2	SWI/SNF related, matrix associated, actin dependent regulator of chromatin, subfamily c, member 2
737	0.581	1423745_at	1110031B06Rik	RIKEN cDNA 1110031B06 gene
738	0.581	1427236_a_at	Mll5	myeloid/lymphoid or mixed-lineage leukemia 5
739	0.581	1448427_at	Ndufa6	NADH dehydrogenase (ubiquinone) 1 alpha subcomplex, 6 (B14)
740	0.581	1428829_at	6820401H01Rik	RIKEN cDNA 6820401H01 gene
741	0.582	1439496_at	4921524J06Rik	RIKEN cDNA 4921524J06 gene
742	0.583	1450449_a_at	2900002H16Rik	RIKEN cDNA 2900002H16 gene
743	0.583	1425968_s_at	Apeg1	aortic preferentially expressed gene 1
744	0.583	1435085_at
745	0.583	1424841_s_at	Rbks	ribokinase
746	0.583	1429116_at	Slc17a5	solute carrier family 17 (anion/sugar transporter), member 5
747	0.583	1423370_a_at	Csnk1g2	casein kinase 1, gamma 2
748	0.583	1423224_at	4432405B04Rik	RIKEN cDNA 4432405B04 gene
749	0.584	1437861_s_at
750	0.584	1424625_a_at	6030446I19Rik	RIKEN cDNA 6030446I19 gene
751	0.584	1417816_s_at	Tde1	tumor differentially expressed 1
752	0.584	1425615_a_at	Pck2	phosphoenolpyruvate carboxykinase 2 (mitochondrial)
753	0.584	1434225_at	MGI:1298390	SWA-70 protein
754	0.584	1427951_s_at	1700009P13Rik	RIKEN cDNA 1700009P13 gene
755	0.585	1449000_at	D10Jhu81e	DNA segment, Chr 10, Johns Hopkins University 81 expressed
756	0.586	1455924_at	Rab6b	RAB6B, member RAS oncogene family
757	0.587	1460346_at	Arsa	arylsulfatase A
758	0.588	1455857_a_at	Rab2b	RAB2B, member RAS oncogene family
759	0.588	1460167_at	Aldh7a1	aldehyde dehydrogenase family 7, member A1
760	0.588	1417596_at	Eppb9	endothelial precursor protein B9
761	0.588	1425028_a_at	Tpm2	tropomyosin 2, beta
762	0.588	1437150_at	1700012H17Rik	RIKEN cDNA 1700012H17 gene
763	0.589	1425312_s_at	D11Ertd636e	DNA segment, Chr 11, ERATO Doi 636, expressed
764	0.589	1454978_at	Ttyh3	tweety homolog 3 (Drosophila)
765	0.59	1430125_s_at	Pqlc1	PQ loop repeat containing 1
766	0.59	1434021_at	C230096C10Rik	RIKEN cDNA C230096C10 gene
767	0.59	1448986_x_at	Dnase2a	deoxyribonuclease II alpha
768	0.591	1419924_at
769	0.591	1418116_at	MGI:1929890	interferon alpha responsive gene
770	0.591	1424654_at	Acp2	acid phosphatase 2, lysosomal
771	0.591	1426968_a_at	Rdh10	retinol dehydrogenase 10 (all-trans)
772	0.591	1453200_at	Rai1	retinoic acid induced 1
773	0.592	1447277_s_at	Pcyox1	prenylcysteine oxidase 1
774	0.592	1418996_a_at	4930469P12Rik	RIKEN cDNA 4930469P12 gene
775	0.592	1416774_at	Wee1	wee 1 homolog (S. pombe)
776	0.593	1451261_s_at	AW049765	expressed sequence AW049765
777	0.593	1427844_a_at	Cebpb	CCAAT/enhancer binding protein (C/EBP), beta
778	0.593	1431611_a_at	Igsf4a	immunoglobulin superfamily, member 4A
779	0.593	1456056_a_at	D6Wsu116e	DNA segment, Chr 6, Wayne State University 116, expressed
780	0.594	1438176_x_at	1110031B06Rik	RIKEN cDNA 1110031B06 gene
781	0.594	1429559_at	Gnaq	guanine nucleotide binding protein, alpha q polypeptide
782	0.595	1435401_at	9430097H08Rik	RIKEN cDNA 9430097H08 gene
783	0.595	1455030_at		16 days neonate cerebellum cDNA, RIKEN full-length enriched library, clone:9630021C19 product:unknown EST, full insert sequence
784	0.595	1423543_at	MGI:1298390	SWA-70 protein
785	0.596	1415756_a_at	Snapap	SNAP-associated protein
786	0.596	1451479_a_at	Tmem53	transmembrane protein 53
787	0.596	1416304_at	Litaf	LPS-induced TN factor
788	0.597	1444242_at		Transcribed locus
789	0.598	1439539_at	Tram2	translocating chain-associating membrane protein 2
790	0.598	1430533_a_at	Ctnnb1	catenin (cadherin associated protein), beta 1, 88kDa
791	0.598	1419867_a_at	Ankhd1	ankyrin repeat and KH domain containing 1
792	0.599	1428916_s_at	Sirt5	sirtuin 5 (silent mating type information regulation 2 homolog) 5 (S. cerevisiae)
793	0.599	1421950_at	Pfdn2	prefoldin 2
794	0.599	1420170_at	Myh9	myosin, heavy polypeptide 9, non-muscle
795	0.6	1416662_at	Sardh	sarcosine dehydrogenase
796	0.6	1435455_at	C79267	expressed sequence C79267
797	0.6	1439478_at	MGI:2159605	mitochondrial acyl-CoA thioesterase 1
798	0.601	1428714_at	Pgrmc2	progesterone receptor membrane component 2
799	0.602	1428646_at	2310056B04Rik	RIKEN cDNA 2310056B04 gene
800	0.602	1436560_at	AW124694	expressed sequence AW124694
801	0.603	1417612_at	Ier5	immediate early response 5
802	0.604	1448372_a_at	Tmem4	transmembrane protein 4
803	0.605	1451525_at	Arhgap12	Rho GTPase activating protein 12
804	0.605	1460211_a_at	Kdelr1	KDEL (Lys-Asp-Glu-Leu) endoplasmic reticulum protein retention receptor 1
805	0.606	1424812_at	BC017158	cDNA sequence BC017158
806	0.606	1451401_a_at	0610009K11Rik	RIKEN cDNA 0610009K11 gene
807	0.607	1451040_at	Hars2	histidyl tRNA synthetase 2
808	0.607	1448648_at	9130005N14Rik	RIKEN cDNA 9130005N14 gene
809	0.607	1434193_at	Zfp258	zinc finger protein 258
810	0.607	1451783_a_at	Kifap3	kinesin-associated protein 3
811	0.609	1422054_a_at	Skil	SKI-like
812	0.61	1422895_at	Vamp4	vesicle-associated membrane protein 4
813	0.61	1444235_at		CDNA clone MGC:14005 IMAGE:3660311, complete cds
814	0.61	1423965_at	Cd99l2	Cd99 antigen-like 2
815	0.61	1424496_at	5133401N09Rik	RIKEN cDNA 5133401N09 gene
816	0.61	1423426_at	1300012G16Rik	RIKEN cDNA 1300012G16 gene
817	0.61	1452235_at	Man1b1	Mannosidase, alpha, class 1B, member 1
818	0.61	1421872_at	Rab24	RAB24, member RAS oncogene family
819	0.611	1452601_a_at	Acbd6	acyl-Coenzyme A binding domain containing 6
820	0.611	1451036_at	Spg21	spastic paraplegia 21 homolog (human)
821	0.612	1452603_at	5330431N19Rik	RIKEN cDNA 5330431N19 gene
822	0.612	1436431_at	1700025G04Rik	RIKEN cDNA 1700025G04 gene
823	0.612	1426587_a_at	Stat3	signal transducer and activator of transcription 3
824	0.613	1415736_at	Pfdn5	prefoldin 5
825	0.613	1434069_at	BC067047	cDNA sequence BC067047
826	0.614	1452119_at	2600005C20Rik	RIKEN cDNA 2600005C20 gene
827	0.614	1426235_a_at	Glul	glutamate-ammonia ligase (glutamine synthase)
828	0.614	1451974_at	Osbpl2	oxysterol binding protein-like 2
829	0.615	1437783_x_at	Tmem4	transmembrane protein 4
830	0.615	1422821_s_at	Stard5	StAR-related lipid transfer (START) domain containing 5
831	0.616	1420641_a_at	Sqrdl	sulfide quinone reductase-like (yeast)
832	0.616	1416773_at	Wee1	wee 1 homolog (S. pombe)
833	0.617	1424628_a_at	1500032D16Rik	RIKEN cDNA 1500032D16 gene
834	0.618	1424148_a_at	AW049765	expressed sequence AW049765
835	0.618	1456070_at	5430405N12Rik	RIKEN cDNA 5430405N12 gene
836	0.618	1449198_a_at	St3gal5	ST3 beta-galactoside alpha-2,3-sialyltransferase 5
837	0.619	1434130_at	Lhfpl2	lipoma HMGIC fusion partner-like 2
838	0.619	1436546_at	6330549D23Rik	RIKEN cDNA 6330549D23 gene
839	0.619	1448491_at	Ech1	enoyl coenzyme A hydratase 1, peroxisomal
840	0.62	1452143_at	Spnb2	spectrin beta 2
841	0.62	1456080_a_at	Tde1	Tumor differentially expressed 1
842	0.62	1427195_at		Mus musculus, clone IMAGE:3983419, mRNA
843	0.621	1417530_a_at	Srp9	signal recognition particle 9
844	0.621	1449001_at	Ivd	isovaleryl coenzyme A dehydrogenase
845	0.621	1431931_a_at	Rabl2a	RAB, member of RAS oncogene family-like 2A
846	0.621	1452161_at	Tiparp	TCDD-inducible poly(ADP-ribose) polymerase
847	0.622	1416857_at	Sdf2	stromal cell derived factor 2
848	0.622	1429429_s_at	A030012M09Rik	RIKEN cDNA A030012M09 gene
849	0.623	1424840_at	Rbks	ribokinase
850	0.623	1452890_at	D630041K24Rik	RIKEN cDNA D630041K24 gene
851	0.623	1431832_x_at	Exosc10	exosome component 10
852	0.623	1460038_at	Pou3f1	POU domain, class 3, transcription factor 1
853	0.623	1449283_a_at	Mapk12	mitogen-activated protein kinase 12
854	0.623	1418929_at	Esrrbl1	estrogen-related receptor beta like 1
855	0.624	1434548_at	Tde1	tumor differentially expressed 1
856	0.624	1417062_at	2810037C14Rik	RIKEN cDNA 2810037C14 gene
857	0.625	1416427_at	Ccni	cyclin I
858	0.625	1424597_at	ORF19	open reading frame 19
859	0.625	1426525_at	Arid2	AT rich interactive domain 2 (Arid-rfx like)
860	0.627	1423263_at	H3f3a	H3 histone, family 3A
861	0.627	1424530_at	Sec14l2	SEC14-like 2 (S. cerevisiae)
862	0.627	1448847_at	Tde1	tumor differentially expressed 1
863	0.628	1434062_at	Rabgap1l	RAB GTPase activating protein 1-like
864	0.628	1415906_at	Tmsb4x	thymosin, beta 4, X chromosome
865	0.628	1428743_at	Bri3bp	Bri3 binding protein
866	0.629	1426362_at	5730537D05Rik	RIKEN cDNA 5730537D05 gene
867	0.629	1448547_at	Rassf3	Ras association (RalGDS/AF-6) domain family 3
868	0.63	1434865_a_at	Exoc7	exocyst complex component 7
869	0.631	1418846_at	Ap4m1	adaptor-related protein complex AP-4, mu 1
870	0.632	1417316_at	Them2	thioesterase superfamily member 2
871	0.632	1419665_a_at	Nupr1	nuclear protein 1
872	0.632	1421610_at	Cx3cl1	chemokine (C-X3-C motif) ligand 1
873	0.632	1428556_at	2610022G08Rik	RIKEN cDNA 2610022G08 gene
874	0.632	1448753_at	Srp9	signal recognition particle 9
875	0.632	1416661_at	Eif3s10	eukaryotic translation initiation factor 3, subunit 10 (theta)
876	0.633	1450843_a_at	Serpinh1	serine (or cysteine) proteinase inhibitor, clade H, member 1
877	0.634	1434557_at	Hip1	huntingtin interacting protein 1
878	0.634	1423532_at	Rnf44	ring finger protein 44
879	0.635	1456502_at	Dyrk2	dual-specificity tyrosine-(Y)-phosphorylation regulated kinase 2
880	0.635	1456733_x_at	Serpinh1	serine (or cysteine) proteinase inhibitor, clade H, member 1
881	0.636	1428113_at	4930403J22Rik	RIKEN cDNA 4930403J22 gene
882	0.636	1426312_at	Bre	brain and reproductive organ-expressed protein
883	0.636	1426857_a_at	Hsdl2	hydroxysteroid dehydrogenase like 2
884	0.636	1418258_s_at	6720463E02Rik	RIKEN cDNA 6720463E02 gene
885	0.637	1428842_a_at	Ngfrap1	nerve growth factor receptor (TNFRSF16) associated protein 1
886	0.638	1423061_at	Arvcf	armadillo repeat gene deleted in velo-cardio-facial syndrome
887	0.638	1452711_at	Spg3a	spastic paraplegia 3A homolog (human)
888	0.638	1449407_at	Cdv1	carnitine deficiency-associated gene expressed in ventricle 1
889	0.638	1427574_s_at	Sh3d19	SH3 domain protein D19
890	0.639	1455133_s_at	AI848100	expressed sequence AI848100
891	0.639	1423779_at	Chchd6	coiled-coil-helix-coiled-coil-helix domain containing 6
892	0.64	1437448_s_at	Ctnnd1	catenin (cadherin associated protein), delta 1
893	0.641	1439038_at	9130227C08Rik	RIKEN cDNA 9130227C08 gene
894	0.642	1428029_a_at	H2afv	H2A histone family, member V
895	0.642	1417255_at	Wdtc2	WD and tetratricopeptide repeats 2
896	0.643	1428608_at	Mylc2b	myosin light chain, regulatory B
897	0.643	1450008_a_at	Ctnnb1	catenin (cadherin associated protein), beta 1, 88kDa
898	0.643	1419666_x_at	Nupr1	nuclear protein 1
899	0.643	1452258_at	6820402O20Rik	RIKEN cDNA 6820402O20 gene
900	0.643	1416708_a_at	D7Bwg0611e	DNA segment, Chr 7, Brigham & Women's Genetics 0611 expressed
901	0.644	1422785_at	Rasa2	RAS p21 protein activator 2
902	0.644	1416830_at	0610031J06Rik	RIKEN cDNA 0610031J06 gene
903	0.644	1427903_at	Phpt1	phosphohistidine phosphatase 1
904	0.644	1423414_at	Ptgs1	prostaglandin-endoperoxide synthase 1
905	0.645	1448422_at	Tmed4	transmembrane emp24 protein transport domain containing 4
906	0.645	1427952_at	Aipl1	aryl hydrocarbon receptor-interacting protein-like 1
907	0.647	1424349_a_at	Lpgat1	lysophosphatidylglycerol acyltransferase 1
908	0.647	1448727_at	Tle6	transducin-like enhancer of split 6, homolog of Drosophila E(spl)
909	0.648	1448546_at	Rassf3	Ras association (RalGDS/AF-6) domain family 3
910	0.649	1427909_at	2410015M20Rik	RIKEN cDNA 2410015M20 gene
911	0.649	1428214_at	Tomm7	translocase of outer mitochondrial membrane 7 homolog (yeast)
912	0.649	1422286_a_at	Tgif	TG interacting factor
913	0.649	1440920_at	Mmp14	Matrix metalloproteinase 14 (membrane-inserted)
914	0.65	1451587_a_at	Tiprl	TIP41, TOR signalling pathway regulator-like (S. cerevisiae)
915	0.651	1452832_s_at	Cds2	CDP-diacylglycerol synthase (phosphatidate cytidylyltransferase) 2
916	0.651	1429181_at	1700009P17Rik	RIKEN cDNA 1700009P17 gene
917	0.653	1432000_a_at	Dedd	death effector domain-containing
918	0.653	1415798_at	Ddr1	discoidin domain receptor family, member 1
919	0.653	1435394_s_at	Rhoc	ras homolog gene family, member C
920	0.653	1416607_at	4931406C07Rik	RIKEN cDNA 4931406C07 gene
921	0.653	1428579_at	Fmnl2	formin-like 2
922	0.654	1416789_at	Idh3g	isocitrate dehydrogenase 3 (NAD+), gamma
923	0.654	1431279_s_at	D630041K24Rik	RIKEN cDNA D630041K24 gene
924	0.654	1450727_a_at	Poldip2	polymerase (DNA-directed), delta interacting protein 2
925	0.654	1424753_at	Nudt14	nudix (nucleoside diphosphate linked moiety X)-type motif 14
926	0.655	1456012_x_at	Rnaset2	ribonuclease T2
927	0.655	1433604_x_at	Aldoa	aldolase 1, A isoform
928	0.657	1449157_at	Nr2c1	nuclear receptor subfamily 2, group C, member 1
929	0.657	1434129_s_at	Lhfpl2	lipoma HMGIC fusion partner-like 2
930	0.658	1436918_at	1810038L18Rik	RIKEN cDNA 1810038L18 gene
931	0.658	1440329_s_at	Gpatc2	G patch domain containing 2
932	0.659	1416327_at	Ufc1	ubiquitin-fold modifier conjugating enzyme 1
933	0.66	1452164_at	BC038286	cDNA sequence BC038286
934	0.66	1434799_x_at	Aldoa	aldolase 1, A isoform
935	0.661	1420160_s_at	Myo1e	myosin IE
936	0.662	1423262_a_at	H3f3a	H3 histone, family 3A
937	0.662	1431354_a_at	Fars2	phenylalanine-tRNA synthetase 2 (mitochondrial)
938	0.662	1423833_a_at	Brp44	brain protein 44
939	0.662	1423973_a_at	Arf3	ADP-ribosylation factor 3
940	0.662	1419359_at	Hexim1	hexamethylene bis-acetamide inducible 1
941	0.662	1417697_at	Soat1	sterol O-acyltransferase 1
942	0.664	1448335_s_at	Ccni	cyclin I
943	0.664	1449230_at	Idua	iduronidase, alpha-L-
944	0.666	1423945_a_at	Pkig	protein kinase inhibitor, gamma
945	0.666	1417892_a_at	Sirt3	sirtuin 3 (silent mating type information regulation 2, homolog) 3 (S. cerevisiae)
946	0.667	1448063_at	Iqsec2	IQ motif and Sec7 domain 2
947	0.667	1424795_a_at	1700001O22Rik	RIKEN cDNA 1700001O22 gene
948	0.667	1418088_a_at	Stx8	syntaxin 8
949	0.668	1415995_at	Casp6	caspase 6
950	0.669	1434205_at	Ppp2r5c	protein phosphatase 2, regulatory subunit B (B56), gamma isoform
951	0.671	1435259_s_at	D2Ertd217e	DNA segment, Chr 2, ERATO Doi 217, expressed
952	0.671	1428197_at	Tspan9	tetraspanin 9
953	0.672	1418901_at	Cebpb	CCAAT/enhancer binding protein (C/EBP), beta
954	0.673	1452696_a_at	4933439C10Rik	RIKEN cDNA 4933439C10 gene
955	0.677	1427879_at	1810031K17Rik	RIKEN cDNA 1810031K17 gene
956	0.678	1456131_x_at	Dag1	dystroglycan 1
957	0.678	1428429_at	Rgmb	RGM domain family, member B
958	0.68	1418988_at	Pex7	peroxisome biogenesis factor 7
959	0.68	1424403_a_at	D5Bwg0860e	DNA segment, Chr 5, Brigham & Women's Genetics 0860 expressed
960	0.68	1418886_s_at	Idh3b	isocitrate dehydrogenase 3 (NAD+) beta
961	0.681	1417691_at	Bin3	bridging integrator 3
962	0.682	1451742_a_at	Ugp2	UDP-glucose pyrophosphorylase 2
963	0.683	1437488_at	Slc9a9	solute carrier family 9 (sodium/hydrogen exchanger), isoform 9
964	0.683	1428857_at	2610304F09Rik	RIKEN cDNA 2610304F09 gene
965	0.685	1417785_at	Pla1a	phospholipase A1 member A
966	0.686	1450885_at	Dffa	DNA fragmentation factor, alpha subunit
967	0.688	1443951_at	C230076A16Rik	RIKEN cDNA C230076A16 gene
968	0.688	1418419_at	4632423N09Rik	RIKEN cDNA 4632423N09 gene
969	0.691	1435450_at	Cpne3	copine III
970	0.693	1443000_at	D3Ertd300e	DNA segment, Chr 3, ERATO Doi 300, expressed
971	0.696	1427069_at	Fbxo28	F-box protein 28
972	0.696	1418101_a_at	Rtn3	reticulon 3
973	0.696	1418885_a_at	Idh3b	isocitrate dehydrogenase 3 (NAD+) beta
974	0.698	1439490_at		Transcribed locus
975	0.699	1450084_s_at	Ivns1abp	influenza virus NS1A binding protein
976	0.701	1451569_at	Nr2c2	nuclear receptor subfamily 2, group C, member 2
977	0.706	1458536_at	Ccni	Cyclin I
978	0.707	1455890_x_at	Snrpn /// LOC545062	small nuclear ribonucleoprotein N /// similar to small nuclear ribonucleoparticle-associated protein
979	0.713	1428215_x_at	Tomm7	translocase of outer mitochondrial membrane 7 homolog (yeast)
980	0.718	1416381_a_at	Prdx5	peroxiredoxin 5
981	0.719	1455446_x_at	Acadsb	acyl-Coenzyme A dehydrogenase, short/branched chain
